1 Running Head: Noncoding markers for building species trees

2

3 **Conserved Non-exonic Elements: A Novel Class of**  
4 **Marker for Phylogenomics**

5

6 **Scott V. Edwards<sup>1\*</sup>, Alison Cloutier<sup>1,2,3</sup>, Allan J. Baker<sup>2,3¶</sup>**

7 *<sup>1</sup>Department of Organismic and Evolutionary Biology and Museum of Comparative Zoology,*

8 *Harvard University, Cambridge, MA 02138 USA*

9 *<sup>2</sup>Department of Natural History, Royal Ontario Museum, Toronto, Ontario, Canada M5S 2C6*

10 *<sup>3</sup>Department of Ecology and Evolutionary Biology, University of Toronto, Ontario, Canada M5S*

11 *3B2*

12 *¶Deceased.*

13 *\*For correspondence: [sedwards@fas.harvard.edu](mailto:sedwards@fas.harvard.edu)*

14

15

## 16 **Abstract**

17 Noncoding markers have a particular appeal as tools for phylogenomic analysis because, at least  
18 in vertebrates, they appear less subject to strong variation in GC content among lineages. Thus  
19 far, ultraconserved elements (UCEs) and introns have been the most widely used noncoding  
20 markers. Here we analyze and study the evolutionary properties of a new type of noncoding  
21 marker, conserved non-exonic elements (CNEEs), which consists of noncoding elements that are  
22 estimated to evolve slower than the neutral rate across a set of species. Although they often  
23 include UCEs, CNEEs are distinct from UCEs because they are not ultraconserved, and, most  
24 importantly, the core region alone is analyzed, rather than both the core and its flanking regions.  
25 Using a data set of 16 birds plus an alligator outgroup, and ~3600 - ~3800 loci per marker type,  
26 we found that although CNEEs were less variable than UCEs or introns and in some cases  
27 exhibited a slower approach to branch resolution as determined by phylogenomic subsampling,  
28 the quality of CNEE alignments was superior to those of the other markers, with fewer gaps and  
29 missing species. Phylogenetic resolution using coalescent approaches was comparable among  
30 the three marker types, with most nodes being fully and congruently resolved. Comparison of  
31 phylogenetic results across the three marker types indicated that one branch, the sister group to  
32 the passerine+falcon clade, was resolved differently and with moderate (> 70%) bootstrap  
33 support between CNEEs and UCEs or introns. Overall, CNEEs appear to be promising as  
34 phylogenomic markers, yielding phylogenetic resolution as high as for UCEs and introns but  
35 with fewer gaps, less ambiguity in alignments and with patterns of nucleotide substitution more  
36 consistent with the assumptions of commonly used methods of phylogenetic analysis.

37 *Keywords:* intron, conserved element, multispecies coalescent, incomplete lineage sorting,  
38 biased-gene conversion

39 As a result of advances in DNA sequencing and phylogenetic theory, as well as broader and  
40 more aggressive taxon sampling and access to museum specimens, phylogenetics is undergoing a  
41 renaissance. “Phylogenomics”, although a term originally coined to denote the increasing need  
42 for a phylogenetic perspective when inferring genome function (Eisen 1998), is now meant also  
43 to signify the expanded scale in which phylogenetics typically is executed in the era of high-  
44 throughput sequencing (Delsuc et al. 2005; Posada 2016). This scaling up has taken two  
45 principle forms: increased taxon sampling as a means of producing greater phylogenetic  
46 accuracy, and perhaps even more pointedly, increased amounts of sequence data and numbers of  
47 loci generated to test a given phylogenetic hypothesis. Many phylogenies now contain hundreds,  
48 if not thousands of taxa, although in many cases highly taxon-rich studies still employ a modest  
49 number of loci or base pairs in the phylogenetic analysis. Through a variety of next-generation  
50 sequencing technologies, systematists now also have access not only to large numbers of loci for  
51 phylogenetic analysis but also a wide diversity of genes and noncoding regions for building  
52 phylogenetic trees (Bi et al. 2012; Faircloth et al. 2012; Chen et al. 2015). This access to a  
53 diversity of loci for building trees has inevitably increased interest in functional ties between  
54 phylogeny and genome history, thereby helping re-capture some of the original intent of the term  
55 “phylogenomics”. For example, comparison of coding regions generated by transcriptomes  
56 across species can reveal key events in the history of adaptation of a clade (Pease et al. 2016),  
57 and phylogenetic analyses of conserved noncoding elements and transposable elements in  
58 vertebrates has yielded insight into major phases of regulatory evolution (Lowe et al. 2011) and  
59 sources of genomic innovation, respectively (Novick et al. 2009).

60 Despite this progress, in many ways systematists are still constrained by technology in  
61 their choice of marker loci for building trees, and this constraint has begun to yield cracks in the

62 vision for phylogenomics going forward (Edwards et al. 2016). For example, transcriptomes are  
63 widely used in plant, invertebrate and vertebrate phylogenomics, and with considerable success,  
64 in part due to their ease of access in organisms without available genomes and their relative ease  
65 of alignment across broad evolutionary distances. Yet, particularly in vertebrate phylogenetics,  
66 the deficiencies of coding regions for phylogenetic analysis have long been noted, even in the  
67 PCR-era of phylogenetics (Chojnowski et al. 2008; Jarvis et al. 2014). For example, Chojnowski  
68 et al. (2008) suggested that introns were superior to coding regions in the phylogenetic analysis  
69 of birds in part because of their higher variability. It is also widely recognized that the third  
70 positions of codons can become saturated in vertebrate data sets encompassing deeper  
71 divergences, sometimes providing unreliable phylogenetic signal. This trend was previously  
72 thought to be confined to fast-evolving mitochondrial genes, but is now generally acknowledged  
73 for nuclear genes as well, in many cases necessitating removal of 3<sup>rd</sup> positions of codons or the  
74 use of amino acids rather than nucleotides (Cummins and McInerney 2011; Pisani et al. 2015).  
75 A compelling example of the challenges of coding regions for phylogenomic analysis has  
76 recently been found for birds, where coding regions showed the highest level of among-lineage  
77 variation in base composition, resulting in severe challenges for phylogenetic analysis and  
78 ultimately yielding gene and species trees with lower congruence than other types of markers  
79 (Jarvis et al. 2014). Some of these deficiencies for phylogenetic analysis can be compensated for  
80 by improved models of molecular evolution (Philippe et al. 2011; Pisani et al. 2015), partitioning,  
81 use of amino acids instead of nucleotides or dropping sites from analysis, yet at the same time  
82 there is a clear need for additional kinds of markers that may yield signals more commensurate  
83 with the major assumptions of many tree-building algorithms, such as base compositional  
84 stationarity.

85 Ultraconserved elements (UCEs) have also emerged as a major type of marker for  
86 phylogenomics, particularly in vertebrates (Faircloth et al. 2012; McCormack et al. 2012;  
87 Lemmon and Lemmon 2013; McCormack et al. 2013). These markers, which consist of and  
88 whose signal is dominated by the more variable regions flanking highly-conserved core regions,  
89 are found throughout vertebrate and other genomes and have a number of features making them  
90 attractive for phylogenetics. They are numerous, allowing the accumulation of thousands of  
91 markers for a given study, and most importantly, the flanking regions are characterized by high  
92 variability, much more so than the conserved regions that are used to identify them. Although  
93 this higher variability yields large numbers of informative sites for phylogenetic analysis, it  
94 comes at the cost of decreasing reliability of alignments as one moves away from the core,  
95 conserved region (Faircloth et al. 2012; McCormack et al. 2013). Perhaps the most useful aspect  
96 of UCEs is their convenience: they can be isolated, through hybrid capture or other methods,  
97 without knowing anything about the genome of the species under study. In a similar fashion,  
98 anchored hybrid enrichment, while not focusing specifically on UCEs, also yields loci easily  
99 comparable among genomically novel taxa (Lemmon et al. 2012). Such loci have been readily  
100 isolated from hundreds of taxa that are otherwise genomically unstudied. Although many  
101 bioinformatics pipelines specifically exclude UCEs that include coding regions, in some studies,  
102 UCEs or ‘anchored’ conserved loci include exons (e.g., Lemmon et al. 2012; Prum et al. 2015).  
103 Additionally, in several studies not explicitly focused on UCEs, the more variable introns  
104 flanking exons have also been accessed in genomically unstudied species in a way similar to the  
105 flanking regions of UCEs, using approaches such as exon-capture or anchored enrichment  
106 (Lemmon et al. 2012; Hamilton et al. 2016). The convenience of UCEs, transcriptomes and  
107 exon-capture when studying organisms whose genomes are not yet sequenced is a major driving

108 force of marker choice in phylogenomics today (Edwards et al. 2016). These markers open up  
109 vast areas of biodiversity whose genomes have not yet been sequenced, either due to the  
110 unavailability of financial resources, small body size (and hence low DNA yield) of the studied  
111 organisms, excessively large or complex genomes, or other factors.

## 112 *Conserved non-exonic elements in phylogenomics*

113 Here we analyze a new type of marker for phylogenomics that appears a promising  
114 addition to the systematists' toolkit. Conserved non-exonic elements (CNEEs) are a class of  
115 marker that was originally studied in the context of genome function. CNEEs are noncoding  
116 regions of the genome that are designated as 'conserved' because they evolve slower than a  
117 putatively neutral class of sites in the focal clade of organisms (Fig. 1). They are called non-  
118 exonic to distinguish them from exons, which also usually evolve more slowly than neutral  
119 regions of the genome. CNEEs are distinct from what are often called "conserved noncoding  
120 elements" (CNEs) in that they can encompass regions of the genome that are sometimes  
121 transcribed but are not in exons. It is often unclear whether genomic regions are transcribed and  
122 made into proteins, and recent work from the ENCODE and other studies suggests that many  
123 regions previously thought to not encode proteins may in fact be transcribed and translated (Ji et  
124 al. 2015). Like UCes, CNEEs have in many cases been found to act as regulatory enhancers,  
125 recruiting transcription factors to influence the expression of nearby or distant genes (Kvon et al.  
126 2016; Leal and Cohn 2016). Crucially, however (Table 1), CNEEs differ from UCes in not  
127 being "ultra-conserved": whereas the core regions of UCes are often identified on the basis of  
128 >95% or higher sequence identity between genomes, the core regions of CNEEs are designated  
129 as conserved only because they evolve more slowly than a putatively neutral rate. As a result,  
130 CNEEs often exhibit moderate levels of variability, especially when compared to the core

131 regions of UCEs (Siepel et al. 2005a). This tendency raises the possibility that CNEEs might  
132 contain sufficient variability to be useful in phylogenetics, while at the same time exhibiting  
133 alignments of a quality that matches or exceeds those of the flanking regions of UCEs or  
134 transcriptomes.

135 CNEEs also differ in the means by which they are identified in genomes. UCEs were  
136 initially identified using arbitrary thresholds of conservation and minimum length applied to  
137 syntenic-aware whole genome alignments of a few exemplar taxa; they are often localized in  
138 additional genomes by blast searches using previously identified UCEs (McCormack et al. 2012).  
139 By contrast, CNEEs are delimited using statistical approaches, such as hidden Markov models  
140 (HMMs), wherein the rate of candidate genomic region is compared to the rate at a class of  
141 putatively neutral sites (Siepel et al. 2005b, Table 1). These models are usually applied to the  
142 entire set of species under analysis (although here we use a hybrid approach in which vertebrate  
143 CNEEs previously identified using a set of aligned vertebrate genomes are identified by blast in  
144 additional bird genomes). Fourfold degenerate sites of protein-coding genes are the most  
145 commonly used class of site to generate a baseline pattern of substitution. (It is reasonable to  
146 question whether 4-fold degenerate sites in coding regions are genuinely neutral and alternatives,  
147 such as ancient transposable elements that do not appear to have assumed functions, have been  
148 used as the putatively neutral class (Siepel et al. 2005a)) Although CNEEs do overlap with the  
149 core regions of UCEs in genomes, and include all noncoding UCEs in principle, the use of only  
150 the conserved core region of CNEEs distinguishes this class of marker and ensures that the  
151 sequences we use here for phylogenetics do not fully overlap with those of UCEs. Additionally,  
152 depending on the thresholds used to identify UCEs and tuning parameters of the HMM used to  
153 identify CNEEs, some UCEs will not be found in the set of CNEEs identified; this frequently





176 alignments (Kent et al. 2003; Schwartz et al. 2003; Blanchette et al. 2004). We then used a  
177 hidden a phylogenetic hidden Markov model (HMM, Siepel and Haussler 2004) to determine  
178 regions of the genome (both coding and noncoding) that evolved slower than a benchmark set of  
179 4-fold degenerate sites. The phylogeny of the 19 vertebrates used by Lowe et al. (2014) is well  
180 known and was assumed as fixed for all genes and genomic regions prior to analysis. This  
181 assumption is standard in pipelines for identifying CNEEs; although it ignores the possibility of  
182 incomplete lineage sorting (ILS), discordance due to ILS between the local genomic region and  
183 the vertebrate species tree we assumed, which has relatively long branches, is likely to be rare.  
184 Still, the potential biases incurred by assuming a fixed tree while identifying CNEEs should be  
185 explored, since ILS is known to influence parameter estimates of other macroevolutionary  
186 phenomena, such as molecular clocks, substitution rates and reconstruction of ancestral  
187 sequences (Burbrink and Pyron 2011; Groussin et al. 2015; Mendes and Hahn 2016). Branch  
188 lengths of the tree for the neutral class of sites were determined using maximum likelihood to  
189 find optimal branch lengths for the set of 4-fold degenerate sites. Conserved sites were defined  
190 as those exhibiting a better fit to a tree with branches no greater than 0.3 (30%) of the length of  
191 the 4-fold degenerate tree. The HMM had two states, “conserved” and “neutral” and the tuning  
192 parameters for the transition rate between states in the HMM were set with an expectation that  
193 CNEEs would on average have a length of 45 bp. This protocol yielded a total of 957,409  
194 conserved elements in total, of which 605,756 fulfilled the criteria for a CNEE. Whereas  
195 Lowe et al. (2014) used 602,539 CNEEs in their study, we retained 3207 CNEEs that were  
196 discarded in Lowe et al. (2014) because they were not assigned to chromosomes in the chicken  
197 assembly used (galGal3), making for a starting total of 605,756 CNEEs. For a detailed account  
198 of the bioinformatics pipeline by which we initially determined a working set of CNEEs, see

199 Lowe et al. (2014). Candidate CNEEs were filtered from this vertebrate-wide set of 605,746  
200 elements referenced on chicken to retain loci  $\geq 400$  bp in length ( $n = 6182$ ). We focused on  
201 CNEEs  $\geq 400$  bp long so as to use a set of loci expected to contain at least a moderate number of  
202 variable and parsimony-informative sites.

203 We then chose 14 exemplar species from the Avian Phylogenomics Project (Jarvis et al.  
204 2014), including chicken, as a test case for phylogenomic analysis (see Supplementary File S1).  
205 These species were chosen so as to capture major branches of the avian tree as it is now known,  
206 and in some cases pairs of species were chosen to determine if our analyses could recapitulate  
207 known or expected relationships (e.g., flamingo and grebe, penguin and loon). This group of 14  
208 species also contains clades that are still unresolved or contentious, such as the precise order of  
209 the multiple outgroups to passerine birds (Hackett et al. 2008; Jarvis et al. 2014; Prum et al.  
210 2015). We also included data from draft genomes of an emu (*Dromaius novaehollandiae*) and  
211 Chilean Tinamou (*Nothoprocta perdicaria*) from Baker et al. (2014) so as to explore the  
212 hypothesis of ratite paraphyly (Harshman et al. 2008; Phillips et al. 2010; Smith et al. 2013), to  
213 make a total of 16 ingroup species. Using an American Alligator (*Alligator mississippiensis*,  
214 Green et al. 2014) genome as an outgroup sequence brought the total taxa used to 17  
215 (SupplementaryFile S1). Blastn searches with chicken query CNEE sequences were used against  
216 each of the 16 non-chicken target genomes at an e-value cutoff  $1e^{-10}$ . CNEEs with no missing  
217 species were retained ( $n = 3822$ ), and *de novo* aligned with default global alignment parameters  
218 in MAFFT v. 7.245 (Kato and Standley 2013).

219 Intron alignments were assembled from the Avian Phylogenomics Project data of Jarvis  
220 et al. (2014); however, individual introns were used rather than alignments concatenating introns  
221 within each protein-coding gene. The SATé-MAFFT alignments provided by Jarvis et al. (2014)

222 were reduced to the taxon subset of interest and gap-only columns removed. Loci greater than  
223 400 bp in aligned sequence length, including the alligator outgroup sequence and with no more  
224 than 3 missing species were retained ( $n = 3733$ ). It is noteworthy that it was straightforward to  
225 compile ~3700 fully populated CNEE alignments of 400 bp or greater, whereas there were only  
226 998 (26.7%) fully-populated orthologous introns from birds available; we will return to this point  
227 in the discussion. Orthologous sequences from Emu and Chilean Tinamou were identified with  
228 blastn searches against draft genome assemblies for these species with chicken, ostrich, and  
229 white-throated tinamou queries, and were profile-aligned to the existing Jarvis et al. (2014)  
230 alignment with MAFFT. Because SATé-MAFFT yields relatively gappy alignments that are  
231 nonetheless “better” than MAFFT-only alignments by some optimality criteria (B. Faircloth, pers.  
232 comm.), comparing alignment statistics using SATé-MAFFT and MAFFT may bias the results.  
233 We therefore applied both SATé-MAFFT and MAFFT to all three marker types to enable side-  
234 by-side comparisons. For the CNEE alignments, we recapitulated the precise SATé-MAFFT  
235 alignment protocol of Jarvis et al. (2014 #4295), including post-alignment trimming with their  
236 custom python script 'filter\_alignment\_fasta\_v1.3B.pl', except that we used SATe v. 2.2.7 with  
237 MAFFT v. 6.717 (Jarvis et al. used SATé 2.1.0 and MAFFT 6.860b). Ultraconserved elements  
238 (UCEs:  $n = 3679$ , representing the full set from Jarvis et al. 2014) were compiled as described  
239 for introns. There was a higher number of fully-populated alignments for UCEs of 400 bp or  
240 greater ( $n = 3669$ ; 99.7%) than for introns.

241 As expected, there was overlap between our sets of CNEEs, UCEs and introns. For  
242 example, 1497 (39.2%) CNEEs overlapped at least one UCE. The degree of overlap between  
243 introns and the other two data sets was much lower: there were 6 introns overlapping CNEEs and  
244 3 introns overlapping UCEs (both  $< 0.2\%$ ). Because UCE loci typically include the conserved

245 core region in addition to the flanking regions, this overlap could lead to non-independence of  
246 our analyses. Therefore, in addition to analyzing the full set of UCEs and CNEEs, we also  
247 analyzed non-overlapping data sets of CNEEs and UCEs; in general, we found that our results  
248 held for overlapping and non-overlapping subsets of data, and we suggest that even if our CNEE  
249 and UCE data sets overlapped completely, analyzing just the core or flanking regions alone  
250 would help clarify the difference in dynamics and performance between these genomic regions.

251 *Measures of alignment quality and substitution dynamics*

252 Alignment lengths, proportions of variable and parsimony informative sites, GC content, and the  
253 amount of missing data per alignment matrix (here defined as the number of gaps and uncalled  
254 bases per total cells in the nucleotide matrix) were calculated with AMAS (Borowiec 2016).  
255 Average pairwise nucleotide identity between species within each locus, and the proportion of  
256 gaps per base pair of aligned sequence were calculated with custom Perl scripts. Unlike the  
257 AMAS calculation of missing data, gaps per bp aligned considers only genuine gap characters  
258 (ignoring uncalled bases) and excludes leading and trailing gaps as well as gaps adjacent to  
259 uncalled bases; it is equivalent to internal gaps in the alignment per total called bases. TrimAl v.  
260 1.2rev59 (Capella-Gutiérrez et al. 2009) was used for column-based alignment filtering, with the  
261 ‘automated1’ option to choose trimming parameters heuristically based on input alignment  
262 characteristics. We recognize that TrimAl and other alignment trimmers may not necessarily  
263 improve phylogenetic analysis in some cases (Tan et al. 2015), but we use them here strictly as a  
264 standard metric for comparing alignment “quality”, without subsequent phylogenetic analysis on  
265 the trimmed alignments. Additionally, we note that in many of the analyses in Tan et al. (2015),  
266 alignment trimmers performed marginally worse only under unsustainably high levels of  
267 trimming. Model-averaged transition/transversion rate ratios (Ti/Tv), the proportion of invariant

268 sites when appropriate and the gamma shape parameter ( $\alpha$ ) were estimated for each alignment  
269 with jModelTest v. 2.1.7 (Darriba et al. 2012). jModelTest runs included six substitution models  
270 (JC, F81, K80, HKY, SYM, and GTR), with invariant sites and unequal base frequencies  
271 allowed and rate variation modeled with 4 gamma categories.

### 272 *Phylogenetic analyses and measures*

273 RAxML v. 8.1.4 (Stamatakis 2014) was used to construct 200 bootstrap replicate gene trees from  
274 each unpartitioned alignment for each locus with a GTR +  $\Gamma$  substitution model; these were  
275 rooted with the Alligator outgroup in DendroPy v. 3.12.0 (Sukumaran and Holder 2010;  
276 Sukumaran and Holder 2015). MP-EST v. 1.5 (Liu et al. 2010) was used to infer species trees  
277 for each marker type from the input set of rooted RAxML bootstrap trees. Each analysis used  
278 three full MP-EST runs starting with a different random number seed and 10 independent tree  
279 searches within each run. Highest scoring trees from each search were used to build a majority-  
280 rule extended (MRE) consensus tree for each MP-EST run using RAxML. Per-site consistency  
281 indices (CI) were calculated with PAUP v. 4a149 (Swofford 2002) using the MRE consensus  
282 gene tree of the 200 RAxML bootstrap replicates for each locus. We did not compute  
283 consistency indices on species trees because gene tree heterogeneity can distort statistics like CI  
284 when all gene trees are forced onto a single topology (Mendes and Hahn 2016). Average  
285 bootstrap supports are also reported for MRE consensus gene trees.

### 286 *Phylogenomic subsampling*

287 Phylogenomic subsampling (Edwards 2016) was used to assess the stability of specific clades for  
288 different subsets of each of the CNEE, intron and UCE data sets. Data sets of increasing  
289 numbers of loci ( $n = 50, 100, 200, 300, 400, 500, 1000, 1500, 2000, 2500, 3000, \text{ and } 3500$  loci)

290 were built by sampling loci with replacement from within each marker type, and repeating the  
291 process to generate 10 independent replicates of a given number of loci within each marker type.  
292 MP-EST was then run on each of the 10 replicates as described above, except that only a single  
293 MP-EST run (but with 10 independent tree searches) was performed for each replicate.  
294 Summary measures are reported by counting the frequency of splits from among the set of MP-  
295 EST output trees for each replicate rather than from a consensus tree.

## 296 RESULTS

### 297 *Alignment and variability metrics for non-coding markers in birds*

298 *Alignment lengths and variability:* Fig. 2 shows the distribution of alignment lengths among the  
299 three marker types and the percentage of variable sites within each alignment. With the  
300 constraint that each alignment must equal or exceed 400 bp, introns had longer alignments (up to  
301 22,138 bp) than CNEEs (longest alignment, 1829 bp; Fig. 2a-c). UCE alignments based on those  
302 of Jarvis et al. (2014) varied from 2,126 – 4279 bp. CNEE alignments exhibit a higher fraction  
303 of populated bases per alignment than do introns and UCEs, with 1210 out of 3822 CNEE  
304 alignments (31.7%) possessing >99 % of populated bases (Fig. 3a and b). No intron alignments  
305 and only a single UCE alignment possessed this high a nucleotide matrix occupancy, whether  
306 considering any undetermined base or gaps between called sequence alone (Fig. 3c). CNEEs  
307 also exhibited a much lower percent of each alignment that was deemed low quality by trimAl  
308 than did introns or UCEs (Fig. 3d, Supplementary File S2. Whereas 1003 out of 3822 CNEE  
309 alignments (26.2%) retained >99 % of bases after trimming, only 1 of the UCE alignments and  
310 none of the intron alignments retained this much after trimming (Fig. 3d). As expected, both  
311 introns and UCEs were more variable than CNEEs (Fig. 2d-f; Supplementary Fig. S1a). The

312 number of parsimony informative sites per alignment varied among markers in a similar way,  
313 with CNEEs having the fewest and introns having the most (Supplementary Fig. S1b). The  
314 number of variable sites scaled more linearly with alignment length for introns ( $r = 0.992$ ,  $P <$   
315  $0.00001$ ) than for UCEs ( $r = 0.666$ ,  $P < 0.0001$ ) or CNEEs ( $r = 0.228$ ,  $P < 0.00001$ ; Fig. 2d-f).  
316 Although the alignment and variability statistics for UCEs changed significantly when analyzed  
317 using the MAFFT-only pipeline we used for CNEEs, the magnitude of the differences were  
318 small and trends among markers did not change (Supplementary File S3). Similarly, when we  
319 re-aligned all three marker types with the SATé-MAFFT used by Jarvis et al. (2014), overall  
320 trends and differences between markers were unchanged (Supplementary File S4).

321 *GC-content and substitution dynamics of noncoding markers:* CNEEs exhibited systematically  
322 lower GC-contents than did introns or UCEs (Fig. 4a and b). There was a correlation between  
323 the GC-contents of different noncoding markers across species, presumably indicating a genome-  
324 wide effect on base composition that influences all three marker types (Supplementary File S5).  
325 A notable outlier in GC-content across all three marker types is the Downy Woodpecker  
326 (*Picoides pubescens*), with average GC contents of 37.52% (CNEEs), 42.44% (introns) and  
327 40.48% (UCEs), values that deviate from the grand mean for each marker type often 10 times  
328 more than for other species (Fig. 4a and b). High variance in GC-content can complicate  
329 phylogenomic analyses, since most phylogenetic models assume that all species in the analysis  
330 share a similar equilibrium base composition (Lockhart et al. 1994; Foster and Hickey 1999;  
331 Mooers and Holmes 2000). We found that the variance in GC-content among species was lowest  
332 for CNEE markers (average variance = 0.82), and higher for intron and UCE markers (average  
333 variance = 5.76 and 3.91, respectively; Fig. 4c). These substitution dynamics held in non-  
334 overlapping sets of CNEEs and UCEs (Supplementary File S6).

335 Using jModelTest, we evaluated the substitution dynamics and optimal substitution  
336 model for each alignment. On average, CNEEs exhibited higher transition/transversion rate  
337 ratios (average 2.44) than did introns (1.90) or UCEs (1.79; Supplementary Fig. S1d). CNEEs  
338 also exhibited intermediate estimates of the gamma shape parameter (average 1.46) compared to  
339 introns (7.81) or UCEs (0.92; Supplementary Fig. S1). Overall, although all three markers  
340 displayed a similar range of nucleotide substitution models, the most complex models  
341 (GTR+ G+ I and GTR+ G) were least prevalent as the best-fitting model for CNEEs (7.2 and  
342 29.2% of loci, respectively) than for introns (13.7 and 73.2%) or UCEs (74.7 and 23.6%;  
343 Supplementary File S7). CNEEs displayed significantly higher consistency indices (mean = 0.92  
344 for full and non-overlapping set) than UCEs (mean = 0.82;  $p < 0.00001$ ) or introns (mean = 0.82;  
345  $p < 0.00001$ ); Supplementary Fig. S1, Supplementary File S6).

#### 346 *Phylogenomic signal and consistency of noncoding sequences*

347 As expected from the rank order of variability of each of the three marker types, gene  
348 trees made from CNEE alignments exhibited the lowest average bootstrap support, with introns  
349 and UCEs having progressively higher support (Supplementary Fig. S1c). However, the  
350 estimates of overall phylogenetic relationships and clade support as judged by species tree  
351 analyses were generally concordant among marker types and with previous analyses using larger  
352 data sets (Jarvis et al. 2014). All markers recovered ratite paraphyly, with the emu clustering  
353 with the two tinamous to the exclusion of the ostrich at 100% bootstrap support (Fig. 5a-c). In  
354 all three trees, the Neognathae are monophyletic and the three taxa representing  
355 Galloanseriformes (Chicken, Turkey and Peking Duck) were monophyletic at 100%, appearing  
356 as expected as sister to all the remaining taxa (Neoaves). All branches in the MP-EST species  
357 trees in this study achieved  $\geq 95\%$  for all marker types, except for two branches in the total



358 CNEE tree, two branches in the total intron tree, and one branch in the total UCE tree. The  
359 branches in question invariably involved relationships among the outgroups to passerine birds  
360 and falcons, a clade termed Australaves (Jarvis et al. 2014; Prum et al. 2015, Fig. 5d-f). Whereas  
361 the total CNEE tree suggests that the Bald Eagle is closer to this clade than the Downy  
362 Woodpecker (albeit with only 72% and 56% bootstrap support, respectively, for these two  
363 branchings), both the total intron and UCE trees support the reverse branching order, with first  
364 Downy Woodpecker (at 87% and 70% bootstrap support for introns and UCEs, respectively),  
365 then Bald Eagle (with 100% support in both cases) forming successive sister groups to the  
366 Australaves. Depending on how one likes to draw bootstrap support cutoffs in phylogenomics  
367 analyses, there is no case among the total marker trees of strongly supported conflict in overall  
368 species tree estimates among the three marker types for any cutoff greater than 87%. This trend  
369 largely held for phylogenetic analysis of the non-overlapping subsets of CNEEs and UCEs  
370 (Supplementary Fig. S2): support values increase for CNEEs (72% to 89% for  
371 eagle+falcon/passerines and 56% to 85% for woodpecker+other 'land birds'), and decrease for  
372 UCEs (70% to 62% for woodpecker+falcon/passerines). When we confine phylogenetic analysis  
373 to the 1000 loci with the highest variability or most highly supported gene trees, the results are  
374 largely similar (Supplementary Fig. S3).

375         The relationships obtained for the three marker types are also similar to most of the  
376 analyses produced by the Avian Phylogenomics Project (Jarvis et al. 2014, Fig. 5d-f) and a  
377 recent, more taxon-rich tree for birds produced with 259 loci, most of which were derived from  
378 coding sequences (Prum et al. 2015). A source of disagreement for the taxa that we have  
379 sampled involved the sister group to Australaves (Prum et al. 2015). Although both Prum et al.  
380 (2015) and Jarvis et al (2014) generally produced trees placing Woodpeckers closer to

381 Australaves than eagles, neither paper produced this result unambiguously; whereas Jarvis et al.  
382 (2014) achieved 100% support for a sister clade to Australaves that included both woodpeckers  
383 and eagles in their total evidence concatenation tree (TENT) tree using ExaML, other analyses  
384 from Jarvis et al. (2014), as well as the results of Prum et al., (2015) , placed woodpeckers as  
385 sister to Australaves, with eagles falling outside this clade, albeit with highly varying levels of  
386 support. The relationships among waterbirds (penguin, loon, flamingo and grebe), although  
387 consistent across analyses and markers in this study, constitute another region of disagreement  
388 with studies employing more taxa. Whereas this study and Prum et al. (2015) suggest  
389 monophyly of the four water birds sampled here (Aequorlitorithes), many of the Jarvis analyses,  
390 including their TENT analysis, suggested paraphyly of this clade. Because our taxon sampling is  
391 so low we naturally defer to these larger studies for the provisionally ‘correct’ results for these  
392 clades, although we note that these larger studies were not able to robustly resolve all  
393 relationships, including the two clades discussed here.

394 We conducted phylogenomic subsampling to study the accumulation of signal as the  
395 number of loci increases for two expected clades that ultimately achieve high certainty for all  
396 data sets as well as for the two uncertain clades described above. The two high-confidence  
397 relationships we examined were the paraphyly of ratites and the sister group to passerines (i.e.  
398 falcons; Fig. 6a and b). We found that all three marker types established high confidence in the  
399 paraphyly of ratites by 200 genes, with introns accumulating signal somewhat faster than CNEEs  
400 and UCEs (Fig. 6a). By contrast, the falcon+passerine clade achieved consistent 100% support  
401 at 1000 loci for introns and UCEs, whereas CNEEs did not achieve an average of 100% support  
402 for the number of loci analyzed here, peaking at 98% support at 3500 loci and 99% with the full  
403 data set (Fig. 6b). For the monophyly of the waterbird clade (Fig. 6c), we found that the

404 accumulation of signal was more rapid for CNEEs and UCEs, and less rapid for introns. Introns  
405 achieved an average bootstrap support of only ~70% for subsamples of 3500 loci (only 61% for  
406 the full data set), whereas average support of similarly sized subsamples of CNEEs and UCEs  
407 approached 100% (98 and 99%, respectively, for the full data set). For this clade, no marker  
408 type exhibited monotonically increasing average support with larger subsamples of loci, although  
409 the lack of monotonic increase was much more pronounced for introns than for the other two  
410 markers (Fig. 6c). The subsampling results for the sister to Australaves are more interesting, in  
411 so far as they begin to suggest genuine conflicts between the marker types. Whereas both introns  
412 and UCEs accumulate stronger signal favoring a woodpecker+Australaves clade (87 and 70%,  
413 respectively; Fig. 5b and c; Fig. 6d), the CNEEs instead accumulate stronger signal favoring an  
414 eagle+Australaves clade, approaching 72% (Fig. 5a, 6d). Whereas CNEEs exhibit a threshold of  
415 sorts for the accumulation of signal for the waterbird clade, increasing in average support and  
416 number of replicates achieving > 70% support at 500 loci (in part an artifact of the particular  
417 intervals chosen for subsampling), introns suggest a threshold at 1500 loci for the  
418 woodpecker/Australaves clade (Supplementary Fig. S4).

## 419 DISCUSSION

420 In this study we explored the evolution of CNEEs, a class of noncoding marker that has not  
421 received attention in terms of its utility for phylogenomics, and compared them to the  
422 performance of two other classes of noncoding markers, introns and UCEs. Overall, the full data  
423 set of CNEEs performed well compared to introns and UCEs, with a similar number (1-2) of  
424 branches in our 17-taxon tree achieving less than 95% support. The utility of CNEEs for  
425 phylogenomic analysis will depend somewhat on the values held by different researchers. If a  
426 researcher values high support for branches achieved quickly as numbers of loci are increased, at

427 the expense of more uncertain and gappy alignments with missing species, then introns and  
428 UCEs clearly outperform CNEEs. However, if a researcher favors higher certainty and quality  
429 of alignment, and a better fit of alignments to the equilibrium assumptions of most phylogenetic  
430 models of nucleotide substitution, then CNEEs may offer advantages. The major advantages of  
431 CNEEs are the ease of obtaining large numbers of high-quality alignments without missing  
432 species, their low homoplasy and their low variance in GC across species. Despite their low  
433 variability, and the correspondingly weak support in gene trees, CNEEs produced a species tree  
434 that rivaled those produced by a similar number of intron and UCE alignments (Fig. 6). Indeed,  
435 given that the CNEE alignments were the shortest of the three marker types, one could argue for  
436 the overall efficiency of CNEEs in terms of phylogenetic resolution per base pair sequenced as  
437 compared to the other two markers.

438 A critical factor is the number of markers of reasonable length available to  
439 phylogeneticists, and the ease of producing fully-populated alignments, since these factors could  
440 place a limit on phylogenomic resolution of a particular marker type. Introns are numerous in  
441 vertebrate genomes, on the order of several times the number of genes, which usually number  
442 about 15,000-20,000. However, orthologous introns often vary substantially in length among  
443 taxa (Vinogradov 2002; Waltari and Edwards 2002; Pozzoli et al. 2007; Zhang and Edwards  
444 2012); due to their high variability and length differences, gaps will be frequent, with many  
445 alignments > 400 bp having large numbers of unfilled (missing) bases. Conserved elements are  
446 very numerous in vertebrate genomes, with as many as 3.6 million elements detected in  
447 mammals, over 80% of which are noncoding (Lindblad-Toh et al. 2011). However, the average  
448 length of these elements is often < 50 bp. Faircloth et al. (2012) were able to assemble 5599  
449 unique UCEs, which need to achieve a certain minimum length of the core region to be

450 detectable by hybrid capture methods. Bejerano et al. (2004) found only 481 fully conserved  
451 UCEs longer than 200 bp in vertebrate genomes, and the total number of UCEs > 100 bp in  
452 vertebrates is estimated to be ~14,000 (Stephen et al. 2008). Today, markers designated as  
453 “UCEs” often contain loci that are not strictly UCEs, but rather CNEEs, whose core is often  
454 more variable than the original definition of UCEs (Bejerano et al. 2004). In this respect, the  
455 number of “UCE” loci has increased in recent studies and can overlap even more with loci  
456 designated here as CNEE.

457         It was straightforward to compile a data set of several thousand CNEE markers > 400 bp  
458 which contained all species, and most of which contained < 2 alignment indels. By contrast,  
459 because of their intrinsic variability or reliance on variable flanking regions, both introns and  
460 UCEs had between 20-40% missing data (gaps) per species per alignment, a consequence of  
461 their high indel rate, and it was challenging to find intron alignments that contained all 17  
462 species in our study. These trends were evident despite the fact that all three marker types were  
463 harvested from whole genomes, as opposed to being generated using molecular methods such as  
464 hybrid capture. The reasons for the lower incidence of fully-populated alignments for introns  
465 does not seem to lie in the lower coverage of some of the genomes used since the CNEEs were  
466 harvested from the same source data. Rather, it seems to lie in the greater challenges of  
467 detecting introns via blast, or by challenges with genome annotations, or the great length of  
468 many introns, which undercuts search algorithms.

469         The three marker types exhibited differing patterns of nucleotide substitution, which  
470 could influence their phylogenetic performance, and which appear to be driven in part by overall  
471 levels of variation. For example CNEEs had the lowest level of among-lineage variation in GC  
472 content, a trait that conforms well with the equilibrium assumptions of most models of

473 nucleotide substitution. To our knowledge we are the first to report the anomalous GC content  
474 of the Downy Woodpecker genome. It is likely that the higher fraction of transposable elements  
475 in this genome (~22%) compared to other birds investigated thus far, as reported by (Zhang et al.  
476 2014), is linked to the outlier status of the Downy Woodpecker in terms of GC content, although  
477 we have not verified the prediction that TEs in this genome are higher in GC than other genomic  
478 regions. As expected due to their inclusion of the slowly evolving core as well as more rapidly  
479 evolving flanking sequences, UCEs exhibited high levels of among-site rate variation (low  $\alpha$ )  
480 compared to introns and CNEEs. Although not necessarily detrimental to phylogenetic analysis,  
481 it is widely acknowledged that high levels of among site rate variation are more difficult to  
482 model than low levels (Vogler et al. 2005; Marshall et al. 2006; Holland et al. 2013). On the  
483 other hand, CNEEs exhibited the highest transition/transversion ratio among the markers;  
484 although high ts/tv ratios, like among-site rate variation, often lead to homoplasy, the higher  
485 consistency index among CNEEs appears here to be driven more by their low substitution rate  
486 than ts/tv ratio. CNEEs were markedly more AT-rich than the other two classes of markers,  
487 which, as a group, tend to be more AT-rich than coding regions . Although AT- versus GC- rich  
488 markers do not present any obvious advantages, Romiguier et al. (2013) recently suggested that,  
489 in mammals, GC-rich markers result in higher gene tree heterogeneity than AT-rich markers,  
490 possibly due to biased gene conversion, making phylogenetic analysis more challenging.

#### 491 *Information Content of CNEEs for Phylogenetic Analysis*

492 Overall, we found that CNEEs delivered an estimate of phylogenetic relationships that  
493 was as strong as that for UCEs and introns. For some expected phylogenetic results, such as the  
494 paraphyly of the ratites, the approach to phylogenetic “certainty” (100% bootstrap support) was as  
495 fast as that for the other two markers. However, for other questions that appear to be gaining

496 consistent support among phylogenomic data sets, such as the falconid sister group of the  
497 passerine birds, the approach to phylogenomic resolution was markedly slower than for UCEs or  
498 introns. And yet for other clades, such as the sister relationship between penguin/loon and  
499 flamingo/grebe, it was introns that failed to achieve high resolution compared to CNEEs and  
500 UCEs. Finally, CNEEs suggested a different sister group to falconids and passerines, namely  
501 eagles, at fairly high (~80%) and increasing support as more loci were accumulated, as compared  
502 to introns and UCEs, which favored woodpeckers as the sister group, again with high support.  
503 This result was the only case of moderately strong conflict among markers in our data set, and in  
504 our view, either result is plausible, given that this node was not resolved with certainty among  
505 larger data sets (Jarvis et al. 2014). For example, the fact that among the taxa we studied the  
506 woodpecker is a base compositional outlier more strongly for introns and UCEs than for CNEEs  
507 could be driving this difference in result. We were able to achieve high and consistent  
508 confidence for nearly all branches in our analysis without binning (Mirarab et al. 2014),  
509 suggesting that large numbers of loci, rather than concatenation of loci, remains a plausible way  
510 forward for phylogenomics (Liu and Edwards 2015). Although our results point to possible  
511 differences in performance and useful trends among these markers, because we only sampled 16  
512 ingroup bird species as exemplars, the generality of these trends requires further investigation.

513         Finally, we do not expect CNEEs to provide resolution at low taxonomic levels or in  
514 phylogeography, where UCEs appear useful (Lemmon and Lemmon 2012; McCormack et al.  
515 2013; Smith et al. 2014; Hamilton et al. 2016; Manthey et al. 2016), in part due to their low  
516 variability but also because, like UCEs, they are likely to be under strong background selection  
517 (Katzman et al. 2007).

518

519 In summary, CNEEs appear to be a promising tool for phylogenomic research. Their low  
520 variability compared to introns and UCEs is offset by the larger numbers of moderately long and  
521 high quality alignments that can be gathered from whole-genome data sets. In the future, as  
522 whole genomes become more readily available, phylogenomic data sets will increasingly be  
523 generated via statistical tools or extraction of large sets of alignments from aligned or unaligned  
524 genomes (Costa et al. 2016), rather than directly by wet lab bench work. Until that time arrives,  
525 wet-lab approaches to gathering loci, such as hybrid capture, will continue to be used. In either  
526 scenario, CNEEs should fare well, because they are readily identified by statistical means from  
527 whole genomes, and yet they would also be amenable to hybrid capture approaches. We expect  
528 that mixtures of noncoding phylogenomic markers, including CNEEs, will be helpful in  
529 understanding the dynamics of currently popular markers such as UCEs and introns and will  
530 contribute to resolving the Tree of Life.

531

#### 532 SUPPLEMENTARY INFORMATION

533 **Supplementary File S1.** Sources of noncoding markers used in this paper, including 14  
534 exemplar species from the Avian Phylogenomics Project.

535 **Supplementary File S2.** Alignment summary measures for all loci.

536 **Supplementary File S3.** Comparison of UCE alignment and variability metrics for SATé-  
537 MAFFT alignments with emu and Chilean tinamou profile aligned, and for de novo alignment of  
538 all sequences with MAFFT.



539 **Supplementary File S4.** Comparison of alignment and variability metrics for de novo  
540 alignment with MAFFT (CNEEs) and SATé-MAFFT alignment with emu and Chilean tinamou  
541 profile aligned (introns and UCEs) as used throughout the manuscript, versus alignment  
542 following the pipeline described in Jarvis et al. (2015).

543 **Supplementary File S5.** Pairwise correlations in per-taxon GC content between marker types.

544 **Supplementary File S6.** Substitution dynamics of non-overlapping sets of CNEEs and UCEs.

545 **Supplementary File S7.** Summary of jModelTest output for all loci.

546 **Supplementary Fig. S1.** Distribution of variable and parsimony informative sites, gene tree  
547 resolution, and substitution dynamics across marker sets.

548 **Supplementary Fig. S2.** Phylogenetic analysis of non-overlapping sets of CNEEs (n = 2318  
549 loci), introns (n = 3685 loci) and UCEs (n = 2232 loci).

550 **Supplementary Fig. S3.** Phylogenetic analysis of the 1000 most strongly supported gene trees  
551 for each marker (top row) and the 1000 most variable markers (bottom row).

552 **Supplementary Fig. S4.** Threshold analysis for subsampling across markers.

553

554

555

556

557

558

## FUNDING

559 This research was supported by NSF grant DEB 1355343 (EAR 1355292) to SVE and Julia  
560 Clarke.

561

## ACKNOWLEDGEMENTS

562 We thank Brant Faircloth for help in assembling the UCE data set, and Brant Faircloth and Craig  
563 Lowe for helpful discussion and comments on the manuscript. This research was generously  
564 supported by the Harvard University FAS Research Computing and the Odyssey Cluster.

565

LITERATURE CITED

- 566 Baker, A. J., Haddrath O., Mcpherson J. D., and Cloutier A. 2014. Genomic Support for a Moa-  
567 Tinamou Clade and Adaptive Morphological Convergence in Flightless Ratites.  
568 *Molecular Biology and Evolution* 31:1686-1696.
- 569 Bejerano, G., Pheasant M., Makunin I., Stephen S., Kent W. J., Mattick J. S., and Haussler D.  
570 2004. Ultraconserved elements in the human genome. *Science* 304:1321-1325.
- 571 Bi, K., Vanderpool D., Singhal S., Linderoth T., Moritz C., and Good J. M. 2012.  
572 Transcriptome-based exon capture enables highly cost-effective comparative genomic  
573 data collection at moderate evolutionary scales. *BMC Genomics* 13:403.
- 574 Blanchette, M., Kent W. J., Riemer C., Elnitski L., Smit A. F. A., Roskin K. M., Baertsch R.,  
575 Rosenbloom K., Clawson H., Green E. D., Haussler D., and Miller W. 2004. Aligning  
576 multiple genomic sequences with the threaded blockset aligner. *Genome Research*  
577 14:708-715.
- 578 Borowiec, M. L. 2016. AMAS: a fast tool for alignment manipulation and computing of  
579 summary statistics. *PeerJ* 4:e1660.
- 580 Burbrink, F. T., and Pyron R. A. 2011. The Impact of Gene-Tree/Species-Tree Discordance on  
581 Diversification-Rate Estimation. *Evolution* 65:1851-1861.
- 582 Capella-Gutiérrez, S., Silla-Martínez J. M., and Gabaldón T. 2009. trimAl: a tool for automated  
583 alignment trimming in large-scale phylogenetic analyses. *Bioinformatics* (Oxford,  
584 England) 25:1972-1973.
- 585 Chen, M. Y., Liang D., and Zhang P. 2015. Selecting Question-Specific Genes to Reduce  
586 Incongruence in Phylogenomics: A Case Study of Jawed Vertebrate Backbone Phylogeny.  
587 *Systematic Biology* 64:1104-1120.

- 588 Chojnowski, J. L., Kimball R. T., and Braun E. L. 2008. Introns outperform exons in analyses of  
589 basal avian phylogeny using clathrin heavy chain genes. *Gene* 410:89-96.
- 590 Costa, I. R., Prosdocimi F., and Jennings W. B. 2016. In silico phylogenomics using complete  
591 genomes: a case study on the evolution of hominoids. *Genome Res* 26:1257-1267.
- 592 Cummins, C. A., and Mcinerney J. O. 2011. A Method for Inferring the Rate of Evolution of  
593 Homologous Characters that Can Potentially Improve Phylogenetic Inference, Resolve  
594 Deep Divergence and Correct Systematic Biases. *Systematic Biology* 60:833-844.
- 595 Darriba, D., Taboada G. L., Doallo R., and Posada D. 2012. jModelTest 2: more models, new  
596 heuristics and parallel computing. *Nature Methods* 9:772-772.
- 597 Delsuc, F., Brinkmann H., and Philippe H. 2005. Phylogenomics and the reconstruction of the  
598 tree of life. *Nature Reviews Genetics* 6:361-375.
- 599 Edwards, S. V. 2016. Phylogenomic subsampling: a brief review. *Zoologica Scripta* 45:63-74.
- 600 Edwards, S. V., Potter S., Schmitt C. J., Bragg J. G., and Moritz C. 2016. Reticulation,  
601 divergence, and the phylogeography–phylogenetics continuum. *Proceedings of the*  
602 *National Academy of Sciences* 113:8025-8032.
- 603 Eisen, J. A. 1998. Phylogenomics: Improving functional predictions for uncharacterized genes  
604 by evolutionary analysis. *Genome Research* 8:163-167.
- 605 Faircloth, B. C., McCormack J. E., Crawford N. G., Harvey M. G., Brumfield R. T., and Glenn T.  
606 C. 2012. Ultraconserved elements anchor thousands of genetic markers spanning multiple  
607 evolutionary timescales *Systematic Biology* 61:717-726.
- 608 Foster, P. G., and Hickey D. A. 1999. Compositional bias may affect both DNA-based and  
609 protein-based phylogenetic reconstructions. *Journal of Molecular Evolution* 48:284-290.

610 Green, R. E., Braun E. L., Armstrong J., Earl D., Nguyen N., Hickey G., Vandewege M. W., St  
611 John J. A., Capella-Gutierrez S., Castoe T. A., Kern C., Fujita M. K., Opazo J. C., Jurka  
612 J., Kojima K. K., Caballero J., Hubley R. M., Smit A. F., Platt R. N., Lavoie C. A.,  
613 Ramakodi M. P., Finger J. W., Suh A., Isberg S. R., Miles L., Chong A. Y., Jaratlerdsiri  
614 W., Gongora J., Moran C., Iriarte A., McCormack J., Burgess S. C., Edwards S. V., Lyons  
615 E., Williams C., Breen M., Howard J. T., Gresham C. R., Peterson D. G., Schmitz J.,  
616 Pollock D. D., Haussler D., Triplett E. W., Zhang G., Irie N., Jarvis E. D., Brochu C. A.,  
617 Schmidt C. J., Mccarthy F. M., Faircloth B. C., Hoffmann F. G., Glenn T. C., Gabaloon  
618 T., Paten B., and Ray D. A. 2014. Three crocodylian genomes reveal ancestral patterns of  
619 evolution among archosaurs. *Science* 346:1335-+.

620 Groussin, M., Hobbs J. K., Szöllösi G. J., Gribaldo S., Arcus V. L., and Gouy M. 2015. Toward  
621 More Accurate Ancestral Protein Genotype–Phenotype Reconstructions with the Use of  
622 Species Tree-Aware Gene Trees. *Molecular Biology and Evolution* 32:13-22.

623 Hackett, S. J., Kimball R. T., Reddy S., Bowie R. C. K., Braun E. L., Braun M. J., Chojnowski J.  
624 L., Cox W. A., Han K. L., Harshman J., Huddleston C. J., Marks B. D., Miglia K. J.,  
625 Moore W. S., Sheldon F. H., Steadman D. W., Witt C. C., and Yuri T. 2008. A  
626 phylogenomic study of birds reveals their evolutionary history. *Science* 320:1763-1768.

627 Hamilton, C. A., Lemmon A. R., Lemmon E. M., and Bond J. E. 2016. Expanding anchored  
628 hybrid enrichment to resolve both deep and shallow relationships within the spider tree of  
629 life. *BMC Evol Biol* 16:212.

630 Harshman, J., Braun E. L., Braun M. J., Huddleston C. J., Bowie R. C., Chojnowski J. L.,  
631 Hackett S. J., Han K. L., Kimball R. T., Marks B. D., Miglia K. J., Moore W. S., Reddy  
632 S., Sheldon F. H., Steadman D. W., Steppan S. J., Witt C. C., and Yuri T. 2008.

- 633 Phylogenomic evidence for multiple losses of flight in ratite birds. *Proc Natl Acad Sci U*  
634 *S A* 105:13462-13467.
- 635 Holland, B. R., Jarvis P. D., and Sumner J. G. 2013. Low-Parameter Phylogenetic Inference  
636 Under the General Markov Model. *Systematic Biology* 62:78-92.
- 637 Jarvis, E. D., Mirarab S., Aberer A. J., Li B., Houde P., Li C., Ho S. Y. W., Faircloth B. C.,  
638 Nabholz B., Howard J. T., Suh A., Weber C. C., Da Fonseca R. R., Li J. W., Zhang F., Li  
639 H., Zhou L., Narula N., Liu L., Ganapathy G., Boussau B., Bayzid M. S., Zavidovych V.,  
640 Subramanian S., Gabaldon T., Capella-Gutierrez S., Huerta-Cepas J., Rekepalli B.,  
641 Munch K., Schierup M., Lindow B., Warren W. C., Ray D., Green R. E., Bruford M. W.,  
642 Zhan X. J., Dixon A., Li S. B., Li N., Huang Y. H., Derryberry E. P., Bertelsen M. F.,  
643 Sheldon F. H., Brumfield R. T., Mello C. V., Lovell P. V., Wirthlin M., Schneider M. P.  
644 C., Prosdocimi F., Samaniego J. A., Velazquez A. M. V., Alfaro-Nunez A., Campos P. F.,  
645 Petersen B., Sicheritz-Ponten T., Pas A., Bailey T., Scofield P., Bunce M., Lambert D. M.,  
646 Zhou Q., Perelman P., Driskell A. C., Shapiro B., Xiong Z. J., Zeng Y. L., Liu S. P., Li Z.  
647 Y., Liu B. H., Wu K., Xiao J., Yinqi X., Zheng Q. M., Zhang Y., Yang H. M., Wang J.,  
648 Smeds L., Rheindt F. E., Braun M., Fjeldsa J., Orlando L., Barker F. K., Jonsson K. A.,  
649 Johnson W., Koepfli K. P., O'brien S., Haussler D., Ryder O. A., Rahbek C., Willerslev  
650 E., Graves G. R., Glenn T. C., McCormack J., Burt D., Ellegren H., Alstrom P., Edwards  
651 S. V., Stamatakis A., Mindell D. P., Cracraft J., Braun E. L., Warnow T., Jun W., Gilbert  
652 M. T. P., and Zhang G. J. 2014. Whole-genome analyses resolve early branches in the  
653 tree of life of modern birds. *Science* 346:1320-1331.
- 654 Ji, Z., Song R., Regev A., and Struhl K. 2015. Many lncRNAs, 5'UTRs, and pseudogenes are  
655 translated and some are likely to express functional proteins. *Elife* 4:e08890.

- 656 Katoh, K., and Standley D. M. 2013. MAFFT multiple sequence alignment software version 7:  
657 improvements in performance and usability. *Mol Biol Evol* 30:772-780.
- 658 Katzman, S., Kern A. D., Bejerano G., Fewell G., Fulton L., Wilson R. K., Salama S. R., and  
659 Haussler D. 2007. Human genome ultraconserved elements are ultraselected. *Science*  
660 317:915.
- 661 Kent, W. J., Baertsch R., Hinrichs A., Miller W., and Haussler D. 2003. Evolution's cauldron:  
662 duplication, deletion, and rearrangement in the mouse and human genomes. *Proceedings*  
663 *of the National Academy of Sciences of the United States of America* 100:11484-11489.
- 664 Kvon, E. Z., Kamneva O. K., Melo S., Dickel D. E., Melo S., Barozzi I., Osterwalder M.,  
665 Mannion B. J., Kvon E. Z., Kamneva O. K., Pickle C. S., Plajzer-Frick I., Lee E. A., Kato  
666 M., Garvin T. H., Akiyama J. A., Afzal V., Lopez-Rios J., Rubin E. M., Dickel D. E., and  
667 Pennacchio L. A. 2016. Progressive Loss of Function in a Limb Enhancer during Snake  
668 Evolution Article Progressive Loss of Function in a Limb Enhancer during Snake  
669 Evolution. *Cell* 167:633-642.
- 670 Leal, F., and Cohn M. J. 2016. Loss and Re-emergence of Legs in Snakes by Modular Evolution  
671 of Sonic hedgehog and HOXD Report Loss and Re-emergence of Legs in Snakes by  
672 Modular Evolution of Sonic hedgehog and HOXD Enhancers. *Current Biology*:1-8.
- 673 Lemmon, A. R., Emme S. A., and Lemmon E. M. 2012. Anchored hybrid enrichment for  
674 massively high-throughput phylogenomics. *Systematic Biology* 61:727-744.
- 675 Lemmon, A. R., and Lemmon E. M. 2012. High-Throughput Identification of Informative  
676 Nuclear Loci for Shallow-Scale Phylogenetics and Phylogeography. *Systematic Biology*  
677 61:745-761.

- 678 Lemmon, E. M., and Lemmon A. R. 2013. High-throughput genomic data in systematics and  
679 phylogenetics. *Annual Review of Ecology, Evolution, and Systematics* 44:99-121.
- 680 Lindblad-Toh, K., Garber M., Zuk O., Lin M. F., Parker B. J., Washietl S., Kheradpour P., Ernst  
681 J., Jordan G., Mauceli E., Ward L. D., Lowe C. B., Holloway A. K., Clamp M., Gnerre S.,  
682 Alfoldi J., Beal K., Chang J., Clawson H., Cuff J., Di Palma F., Fitzgerald S., Flicek P.,  
683 Guttman M., Hubisz M. J., Jaffe D. B., Jungreis I., Kent W. J., Kostka D., Lara M.,  
684 Martins A. L., Masingham T., Moltke I., Raney B. J., Rasmussen M. D., Robinson J.,  
685 Stark A., Vilella A. J., Wen J. Y., Xie X. H., Zody M. C., Worley K. C., Kovar C. L.,  
686 Muzny D. M., Gibbs R. A., Warren W. C., Mardis E. R., Weinstock G. M., Wilson R. K.,  
687 Birney E., Margulies E. H., Herrero J., Green E. D., Haussler D., Siepel A., Goldman N.,  
688 Pollard K. S., Pedersen J. S., Lander E. S., Kellis M., Inst B., Med B. C., and Univ W.  
689 2011. A high-resolution map of human evolutionary constraint using 29 mammals.  
690 *Nature* 478:476-482.
- 691 Liu, L., and Edwards S. V. 2015. Comment on “Statistical binning enables an accurate  
692 coalescent-based estimation of the avian tree”. *Science* 350:171.
- 693 Liu, L., Yu L., and Edwards S. 2010. A maximum pseudo-likelihood approach for estimating  
694 species trees under the coalescent model. *BMC Evolutionary Biology* 10:302.
- 695 Lockhart, P. J., Steel M. A., Hendy M. D., and Penny D. 1994. Recovering evolutionary trees  
696 under a more realistic model of sequence evolution. *Molecular Biology and Evolution*  
697 11:605-612.
- 698 Lowe, C. B., Clarke J. A., Baker A. J., Haussler D., and Edwards S. V. 2014. Feather  
699 development genes and associated regulatory innovation predate the origin of Dinosauria.  
700 *Molecular Biology and Evolution* 32:23-28.



- 701 Lowe, C. B., Kellis M., Siepel A., Raney B. J., Clamp, Michele, Salama S. R., Kingsley D. M.,  
702 Lindblad-Toh K., and Haussler D. 2011. Three periods of regulatory innovation during  
703 vertebrate evolution. *Science* 333:1019-1024.
- 704 Manthey, J. D., Campillo L. C., Burns K. J., and Moyle R. G. 2016. Comparison of Target-  
705 Capture and Restriction-Site Associated DNA Sequencing for Phylogenomics: A Test in  
706 Cardinalid Tanagers (Aves, Genus: *Piranga*). *Systematic biology* 65:640-650.
- 707 Marshall, D. C., Simon C., and Buckley T. R. 2006. Accurate branch length estimation in  
708 partitioned Bayesian analyses requires accommodation of among-partition rate variation  
709 and attention to branch length priors. *Systematic Biology* 55:993-1003.
- 710 McCormack, J. E., Faircloth B. C., Crawford N. G., Gowaty P. A., Brumfield R. T., and Glenn T.  
711 C. 2012. Ultraconserved elements are novel phylogenomic markers that resolve placental  
712 mammal phylogeny when combined with species tree analysis. *Genome Research*  
713 22:746-754.
- 714 McCormack, J. E., Hird S. M., Zellmer A. J., Carstens B. C., and Brumfield R. T. 2013.  
715 Applications of next-generation sequencing to phylogeography and phylogenetics.  
716 *Molecular Phylogenetics and Evolution* 66:526-538.
- 717 Mendes, F. K., and Hahn M. W. 2016. Gene Tree Discordance Causes Apparent Substitution  
718 Rate Variation. *Systematic Biology* 65:711-721.
- 719 Mirarab, S., Bayzid M. S., Boussau B., and Warnow T. 2014. Statistical binning enables an  
720 accurate coalescent-based estimation of the avian tree, Pages 1250463, *Science*.
- 721 Mooers, A. O., and Holmes E. C. 2000. The evolution of base composition and phylogenetic  
722 inference. *Trends in Ecology & Evolution* 15:365-369.

- 723 Novick, P. A., Basta H., Floumanhaft M., McClure M. A., and Boissinot S. 2009. The  
724 Evolutionary dynamics of autonomous non-LTR retrotransposons in the lizard *Anolis*  
725 *carolinensis* shows more similarity to fish than mammals. *Molecular Biology and*  
726 *Evolution* 26:1811-1822.
- 727 Pease, J. B., Haak D. C., Hahn M. W., and Moyle L. C. 2016. Phylogenomics Reveals Three  
728 Sources of Adaptive Variation during a Rapid Radiation. *Plos Biology* 14.
- 729 Philippe, H., Brinkmann H., Lavrov D. V., Littlewood D. T. J., Manuel M., Worheide G., and  
730 Baurain D. 2011. Resolving Difficult Phylogenetic Questions: Why More Sequences Are  
731 Not Enough. *Plos Biology* 9.
- 732 Phillips, M. J., Gibb G. C., Crimp E. A., and Penny D. 2010. Tinamous and moa flock together:  
733 mitochondrial genome sequence analysis reveals independent losses of flight among  
734 ratites. *Syst Biol* 59:90-107.
- 735 Pisani, D., Pett W., Dohrmann M., Feuda R., Rota-Stabelli O., Philippe H., Lartillot N., and  
736 Worheide G. 2015. Genomic data do not support comb jellies as the sister group to all  
737 other animals. *Proceedings of the National Academy of Sciences of the United States of*  
738 *America* 112:15402-15407.
- 739 Posada, D. 2016. Phylogenomics for Systematic Biology. *Systematic Biology* 65:353-356.
- 740 Pozzoli, U., Menozzi G., Comi G. P., Cagliani R., Bresolin N., and Sironi M. 2007. Intron size in  
741 mammals: complexity comes to terms with economy. *Trends in Genetics* 23:20-24.
- 742 Prum, R. O., Berv J. S., Dornburg A., Field D. J., Townsend J. P., Lemmon E. M., and Lemmon  
743 A. R. 2015. A comprehensive phylogeny of birds (Aves) using targeted next-generation  
744 DNA sequencing. *Nature* 526:569-U247.

- 745 Romiguier, J., Ranwez V., Delsuc F., Galtier N., and Douzery E. J. P. 2013. Less is more in  
746 mammalian phylogenomics: AT-Rich genes minimize tree conflicts and unravel the root  
747 of placental mammals. *Molecular Biology and Evolution* 30:2134-2144.
- 748 Schwartz, S., Kent W. J., Smit A., Zhang Z., Baertsch R., Hardison R. C., Haussler D., and  
749 Miller W. 2003. Human-mouse alignments with BLASTZ. *Genome Research* 13:103-107.
- 750 Siepel, A., Bejerano G., Pedersen J. S., Hinrichs A. S., Hou M., Rosenbloom K., Clawson H.,  
751 Spieth J., Hillier L. W., Richards S., Weinstock G. M., Wilson R. K., Gibbs R. A., Kent  
752 W. J., Miller W., and Haussler D. 2005a. Evolutionarily conserved elements in vertebrate,  
753 insect, worm, and yeast genomes. *Genome Research* 15:1034-1050.
- 754 Siepel, A., Bejerano G., Pedersen J. S., Hinrichs A. S., Hou M. M., Rosenbloom K., Clawson H.,  
755 Spieth J., Hillier L. W., Richards S., Weinstock G. M., Wilson R. K., Gibbs R. A., Kent  
756 W. J., Miller W., and Haussler D. 2005b. Evolutionarily conserved elements in vertebrate,  
757 insect, worm, and yeast genomes. *Genome Research* 15:1034-1050.
- 758 Siepel, A., and Haussler D. 2004. Phylogenetic estimation of context-dependent substitution  
759 rates by maximum likelihood. *Mol Biol Evol* 21:468-488.
- 760 Smith, B. T., Harvey M. G., Faircloth B. C., Glenn T. C., and Brumfield R. T. 2014. Target  
761 capture and massively parallel sequencing of ultraconserved elements for comparative  
762 studies at shallow evolutionary time scales. *Syst Biol* 63:83-95.
- 763 Smith, J. V., Braun E. L., and Kimball R. T. 2013. Ratite nonmonophyly: independent evidence  
764 from 40 novel Loci. *Syst Biol* 62:35-49.
- 765 Stamatakis, A. 2014. RAxML version 8: a tool for phylogenetic analysis and post-analysis of  
766 large phylogenies. *Bioinformatics* 30:1312-1313.

- 767 Stephen, S., Pheasant M., Makunin I. V., and Mattick J. S. 2008. Large-scale appearance of  
768 ultraconserved elements in tetrapod genomes and slowdown of the molecular clock. *Mol*  
769 *Biol Evol* 25:402-408.
- 770 Sukumaran, J., and Holder M. 2010. DendroPy: a Python library for phylogenetic computing.  
771 *Bioinformatics* 26:1569-1571.
- 772 Sukumaran, J., and Holder M. 2015. SumTrees: Phylogenetic Tree Summarization, version 4.0.0.
- 773 Swofford, D. L. 2002. Phylogenetic analysis using parsimony (\* and other methods). Version  
774 4. Sinauer Associates, Sunderland, MA.
- 775 Tan, G., Muffato M., Ledergerber C., Herrero J., Goldman N., Gil M., and Dessimoz C. 2015.  
776 Current Methods for Automated Filtering of Multiple Sequence Alignments Frequently  
777 Worsen Single-Gene Phylogenetic Inference. *Syst Biol* 64:778-791.
- 778 Vinogradov, A. E. 2002. Growth and decline of introns. *Trends in Genetics* 18:232-236.
- 779 Vogler, A. P., Cardoso A., and Barraclough T. G. 2005. Exploring rate variation among and  
780 within sites in a densely sampled tree: Species level phylogenetics of North American  
781 tiger beetles (Genus *Cicindela*). *Systematic Biology* 54:4-20.
- 782 Waltari, E., and Edwards S. V. 2002. Evolutionary dynamics of intron size, genome size, and  
783 physiological correlates in archosaurs. *American Naturalist* 160:539-552.
- 784 Zhang, G. J., Li C., Li Q. Y., Li B., Larkin D. M., Lee C., Storz J. F., Antunes A., Greenwold M.  
785 J., Meredith R. W., Odeen A., Cui J., Zhou Q., Xu L. H., Pan H. L., Wang Z. J., Jin L. J.,  
786 Zhang P., Hu H. F., Yang W., Hu J., Xiao J., Yang Z. K., Liu Y., Xie Q. L., Yu H., Lian J.  
787 M., Wen P., Zhang F., Li H., Zeng Y. L., Xiong Z. J., Liu S. P., Zhou L., Huang Z. Y.,  
788 An N., Wang J., Zheng Q. M., Xiong Y. Q., Wang G. B., Wang B., Wang J. J., Fan Y.,  
789 Da Fonseca R. R., Alfaro-Nunez A., Schubert M., Orlando L., Mourier T., Howard J. T.,

790 Ganapathy G., Pfenning A., Whitney O., Rivas M. V., Hara E., Smith J., Farre M.,  
791 Narayan J., Slavov G., Romanov M. N., Borges R., Machado J. P., Khan I., Springer M.  
792 S., Gatesy J., Hoffmann F. G., Opazo J. C., Hastad O., Sawyer R. H., Kim H., Kim K. W.,  
793 Kim H. J., Cho S., Li N., Huang Y. H., Bruford M. W., Zhan X. J., Dixon A., Bertelsen  
794 M. F., Derryberry E., Warren W., Wilson R. K., Li S. B., Ray D. A., Green R. E., O'brien  
795 S. J., Griffin D., Johnson W. E., Haussler D., Ryder O. A., Willerslev E., Graves G. R.,  
796 Alstrom P., Fjeldsa J., Mindell D. P., Edwards S. V., Braun E. L., Rahbek C., Burt D. W.,  
797 Houde P., Zhang Y., Yang H. M., Wang J., Jarvis E. D., Gilbert M. T. P., Wang J., and  
798 Consortium A. G. 2014. Comparative genomics reveals insights into avian genome  
799 evolution and adaptation. *Science* 346:1311-1320.

800 Zhang, Q., and Edwards S. V. 2012. The evolution of intron size in amniotes: a role for powered  
801 flight? *Genome Biology and Evolution*.

802

803

804 Table 1. Differences between vertebrate CNEEs and UCEs for phylogenetic analysis. This table  
805 focuses on the classical definition of UCEs as originally described by Bejerano et al. (2004) and  
806 Faircloth et al. (2012).

| UCEs                                                                                                 | CNEEs                                                                                             |
|------------------------------------------------------------------------------------------------------|---------------------------------------------------------------------------------------------------|
| Individual elements found throughout vertebrates, from fish to mammals/birds                         | CNEEs arise variably in evolution, and are not necessarily found in all vertebrate clades         |
| Information in flanking regions principally used for phylogenetic analysis                           | Core region used for phylogenetic analysis                                                        |
| Can be coding or noncoding                                                                           | Only noncoding                                                                                    |
| Core regions are ultraconserved                                                                      | Core regions evolve slower than neutral regions, and thus can evolve faster than UCE core regions |
| Discovered via arbitrary conservation and length thresholds on synteny-aware whole-genome alignments | Discovered via tuned hidden Markov model                                                          |

807

808

809 **Figure legends**

810

811 **Figure 1.** Hypothetical schematic of comparisons of evolutionary rates of different non-coding  
812 markers discussed in this paper. The shading of each bar is meant to indicate the distribution of  
813 rates within the range indicated by each bar. Thus, as found in this paper, introns are somewhat  
814 more variable than UCEs, and CNEEs are less conserved than classically defined core regions of  
815 UCEs but not as variable as introns or the neutral rate.

816

817 **Figure 2:** *Top row:* Distribution of aligned sequence lengths for a) CNEEs (3822 loci), b) introns  
818 (3579 loci), and c) UCEs (3679 loci). *Bottom row:* Correlations between alignment length and  
819 number of variable sites for d) CNEEs ( $r=0.2277$ ,  $P<0.00001$ ), e) introns ( $r=0.9918$ ,  $P<0.00001$ )  
820 and f) UCEs ( $r=0.6665$ ,  $P<0.0001$ ).

821

822 **Figure 3.** Variation in alignment gappiness among marker types. a) Average percentage of  
823 undetermined bases per alignment for each marker type and taxon. Here, undetermined bases  
824 indicates both gaps and Ns in each alignment. Alignments that were missing any species were  
825 excluded before analysis. b) Same data as in a, expressed as a histogram. c) Distribution of gaps  
826 per aligned base pairs, here including only genuine missing sequence. d) Distribution of the  
827 percentage of each alignment remaining after trimming with TrimAl. See methods for further  
828 discussion.

829

830 **Figure 4.** Patterns of GC content variation among markers and taxa. Alignments in which a  
831 taxon is entirely absent are omitted from all calculations. a) Per-taxon values for mean GC  
832 content for each marker type. b) Distribution of GC content among species for each marker type.

833 c) Variance in GC content among taxa for each marker type.

834

835 **Figure 5.** Species tree topologies discussed in this study. *Top row:* MP-EST species trees for a)  
836 CNEEs (3822 loci), b) introns (3579 loci), and c) UCEs (3679 loci), with support values < 100%  
837 indicated. *Bottom row:* Total evidence nucleotide trees (TENT), each built from 2516 introns,  
838 3769 UCEs, and 8251 protein-coding genes, from Jarvis et al. (2014), pruned to the taxon set  
839 used in the current study. d) MP-EST unbinned analysis, e) MP-EST binned analysis and f)  
840 concatenated analysis. Support values are omitted from the pruned Jarvis et al. trees. The main  
841 tree presented in Prum et al. (2015) is identical to the tree depicted in panel d, assuming that  
842 Chilean Tinamou and Emu would fall where found in other studies.

843

844 **Figure 6.** Phylogenomic subsampling, with MP-EST species trees inferred for twelve datasets  
845 of increasing numbers of randomly chosen loci, and with ten replicates per dataset. In each row,  
846 left panels plot the mean bootstrap support among the ten MP-EST replicates for each marker  
847 type and data set size. At right are the two branches, indicated by stars, whose support is  
848 investigated by subsampling, with open and solid markers indicating support for one or the other  
849 branch. a) Trends in support with increasing numbers of loci for paraphyly of ratites. b) Trends  
850 in support for the branch uniting falcons as the sister group to passerine birds. c) Trends in  
851 support for competing hypotheses placing either core landbirds  
852 (songbirds+falcon+eagle+woodpecker) or (flamingo+grebe) as the sister group to  
853 (penguin+loon). d) Trends in support for either bald eagle or downy woodpecker as the sister to  
854 (songbirds+falcon).



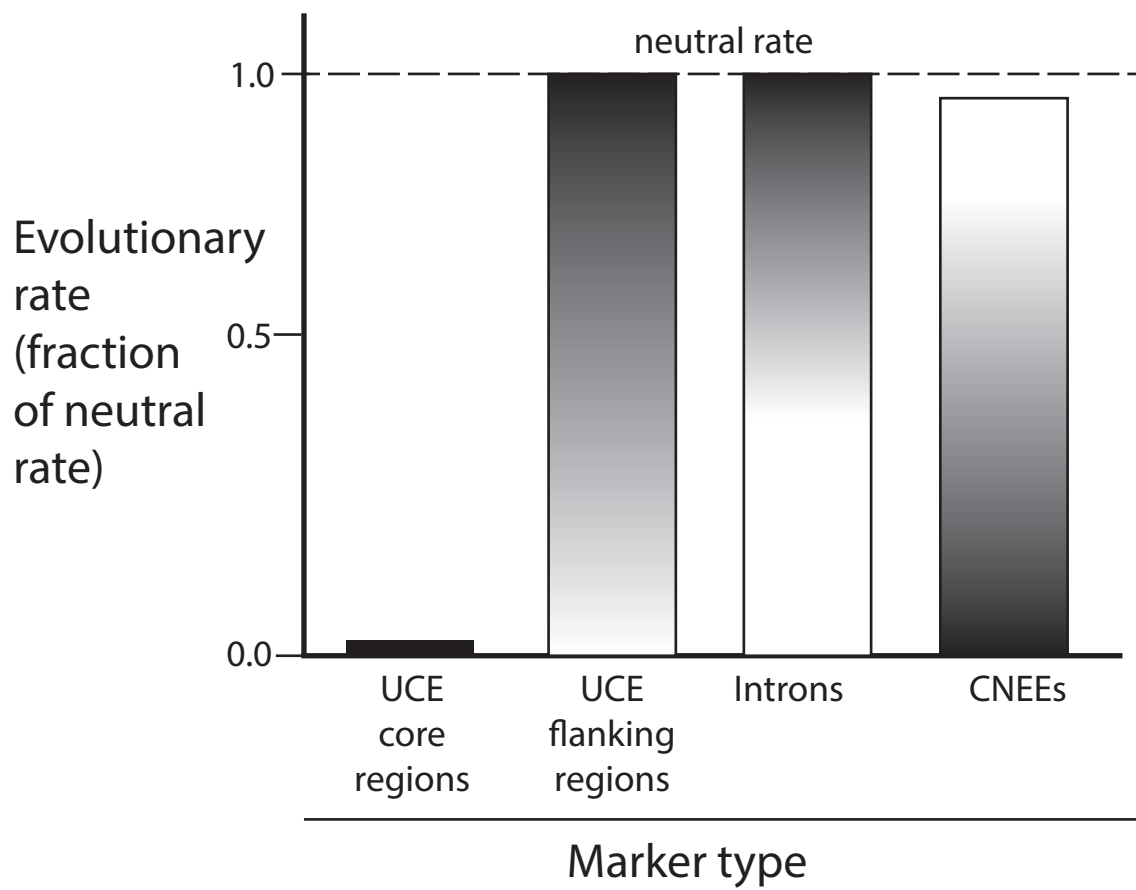

Fig. 1

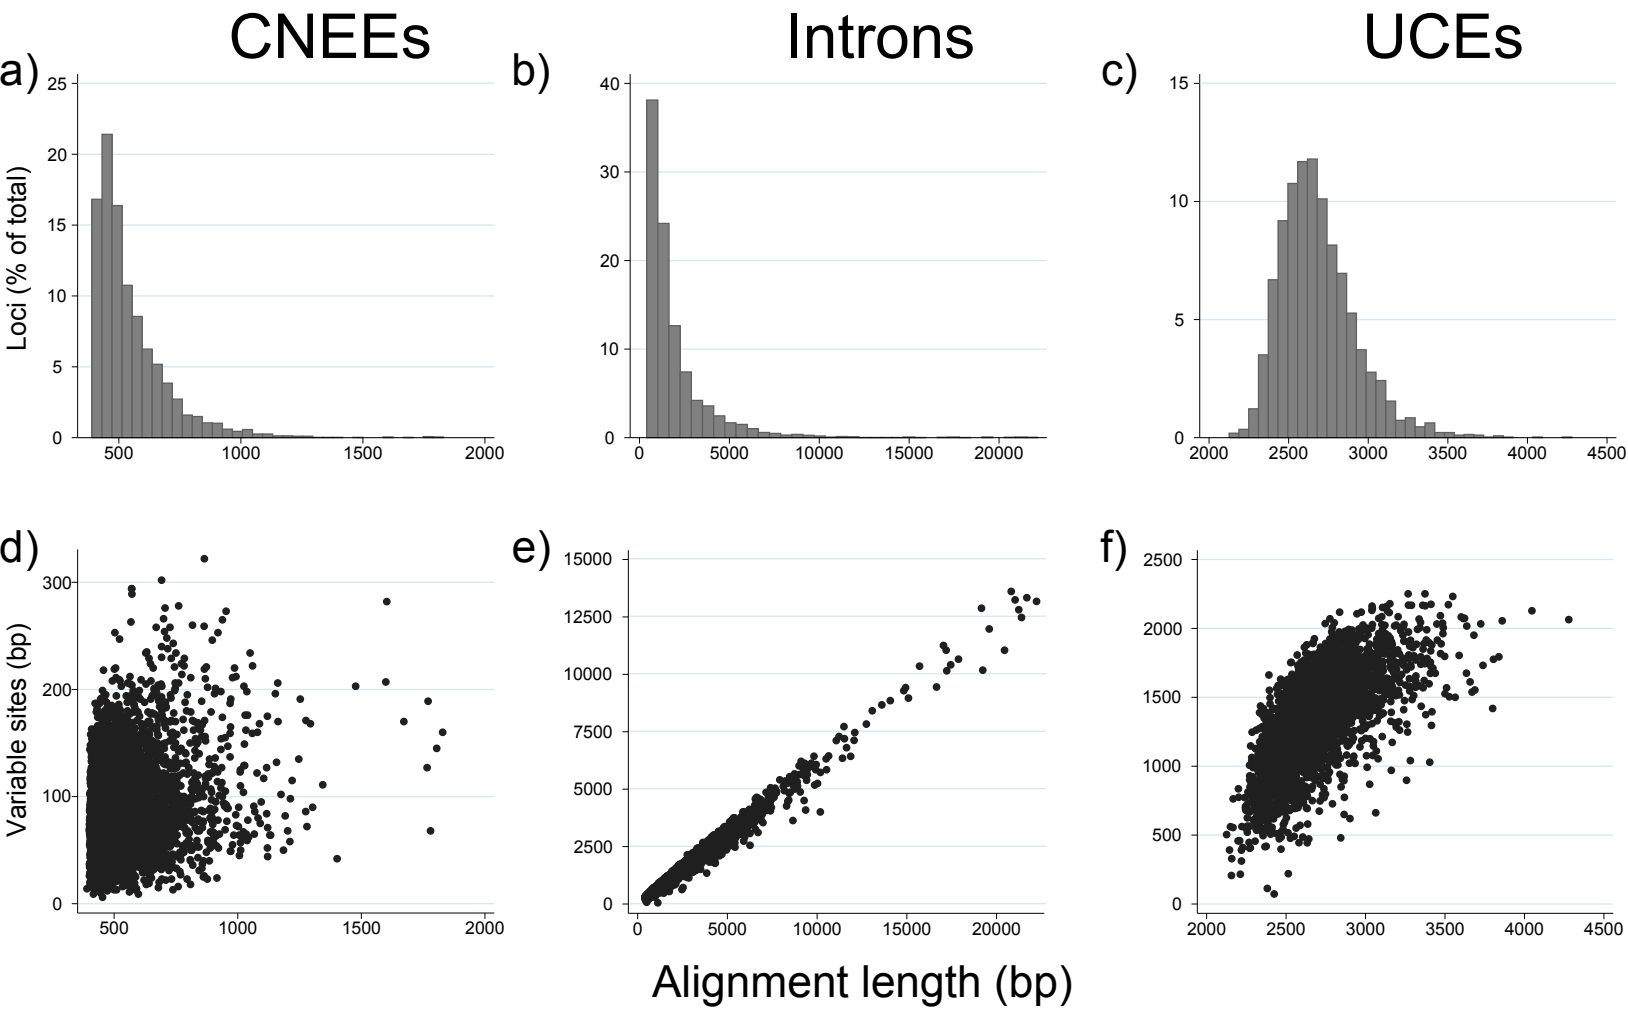

Fig. 2

a)

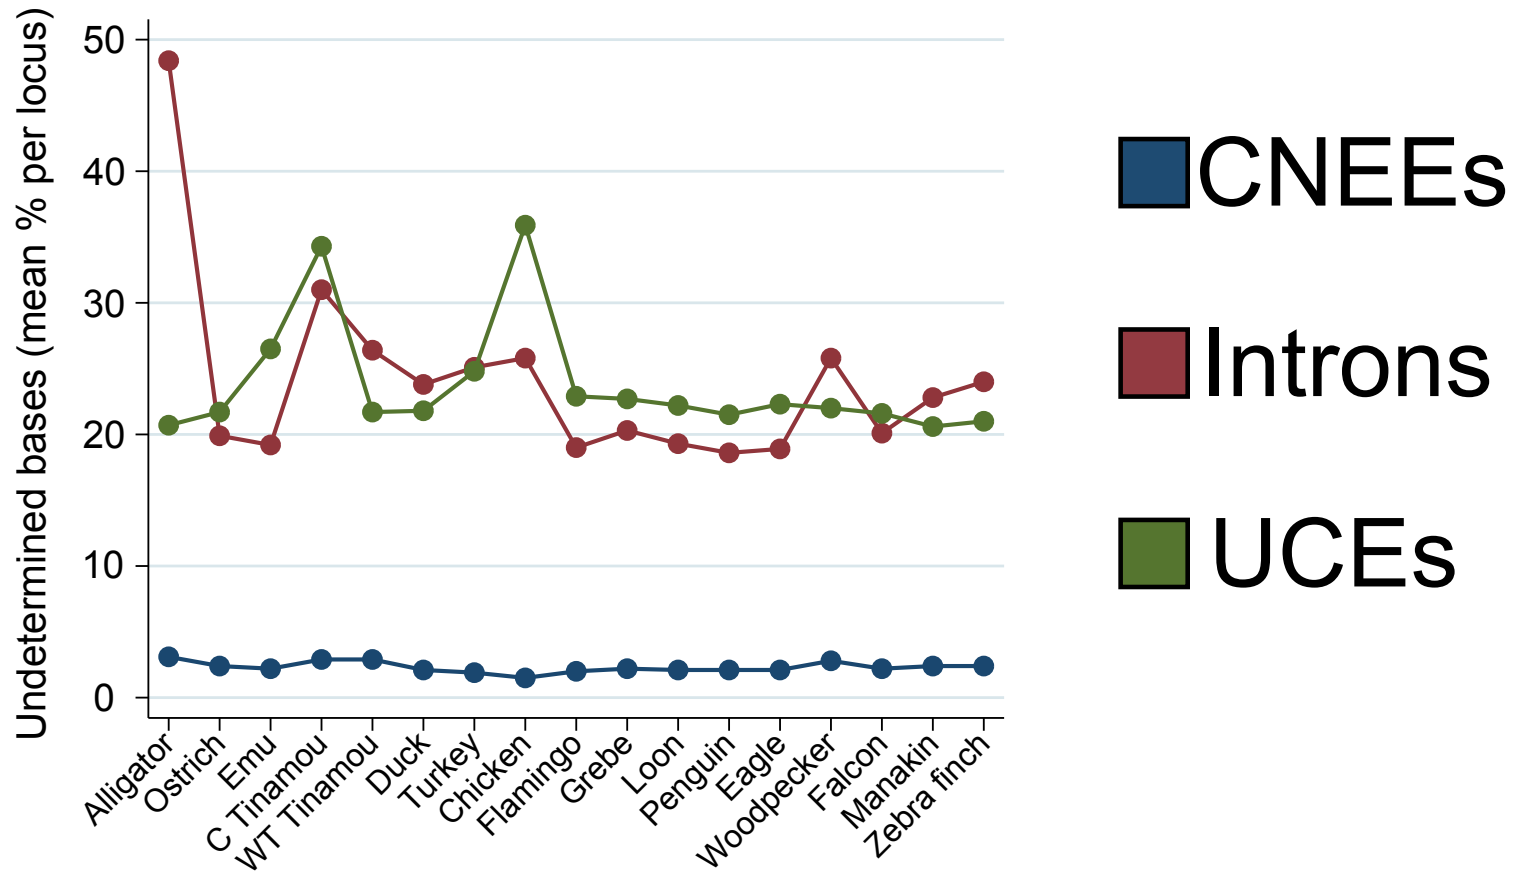

b)

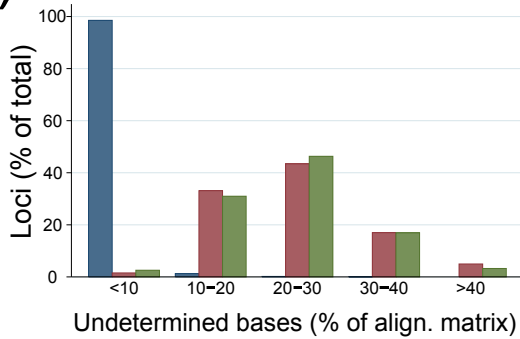

c)

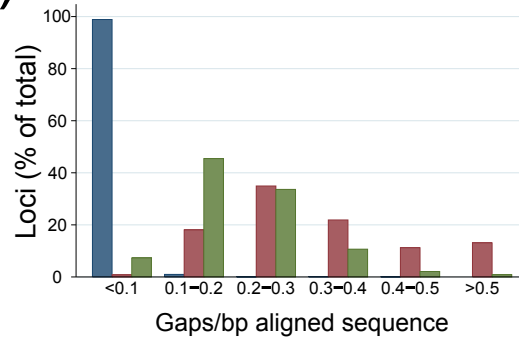

d)

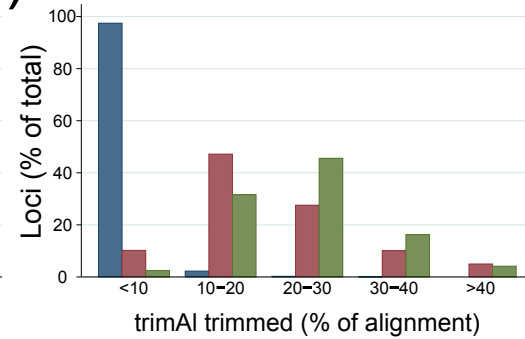

Fig. 3

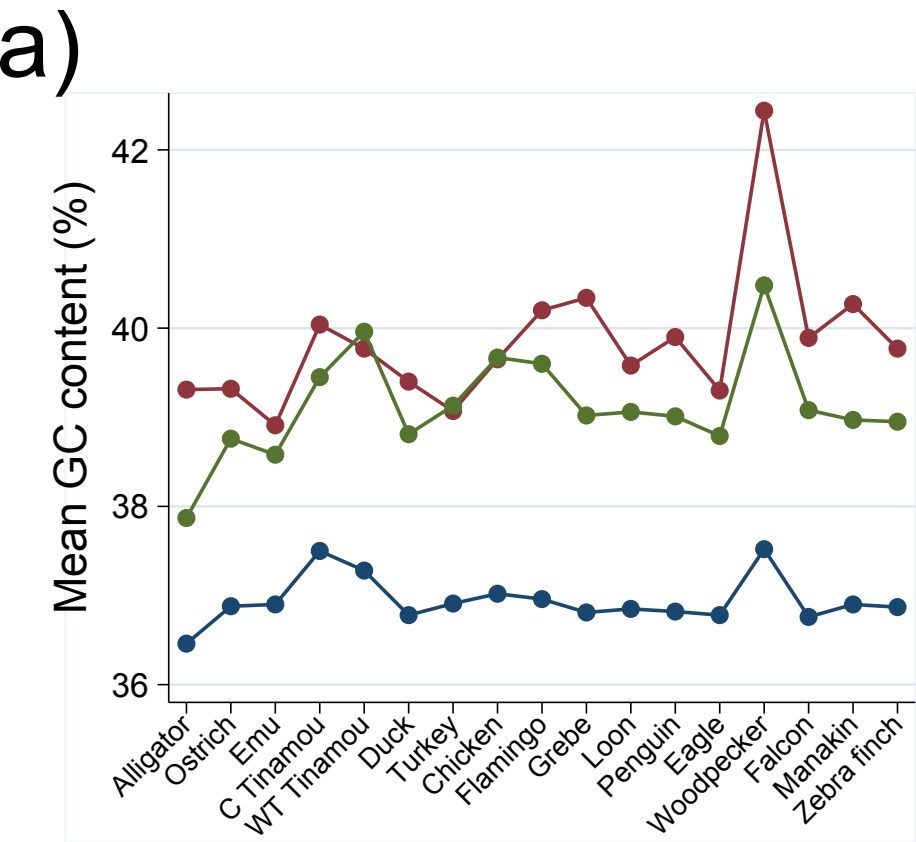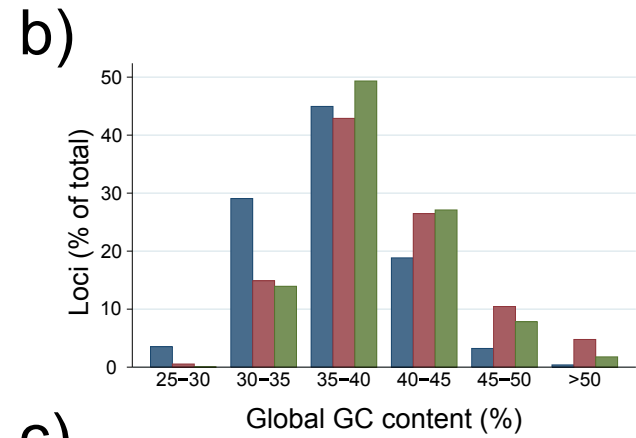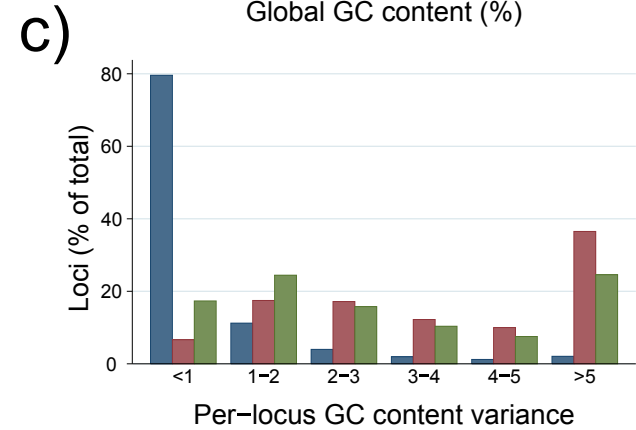

■ CNEEs   ■ Introns   ■ UCEs

Fig. 4

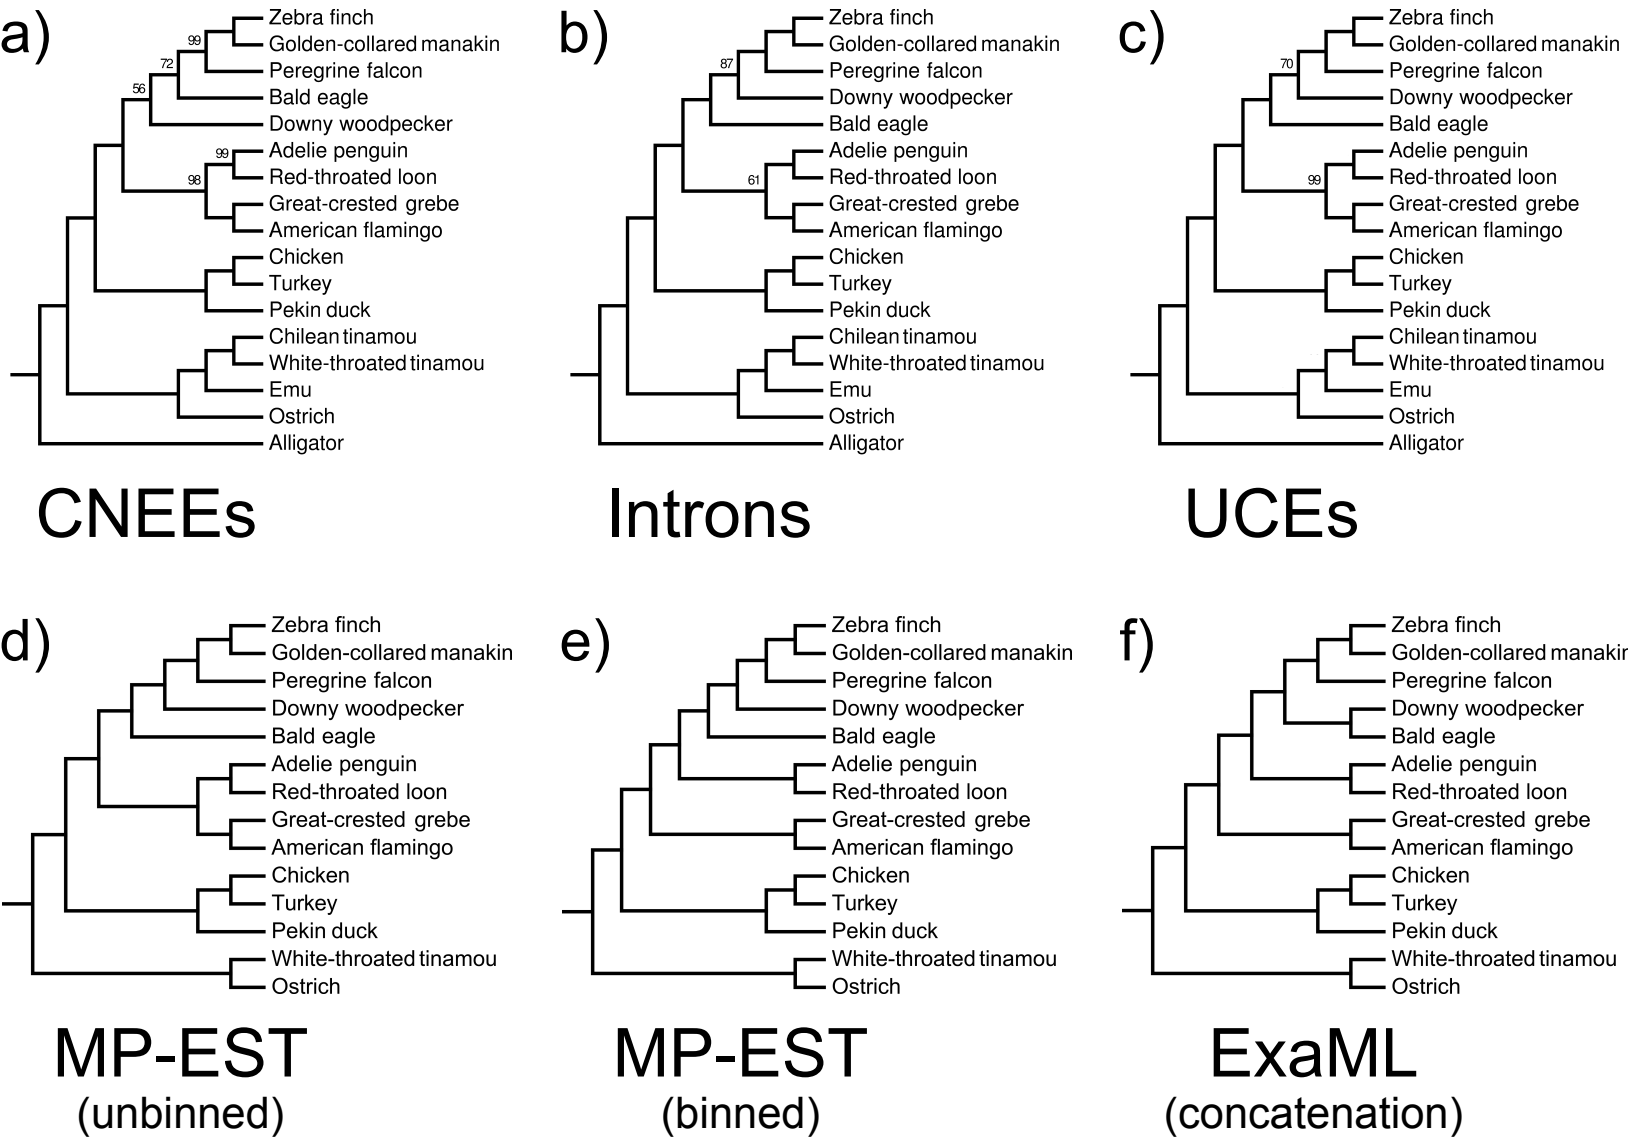

Fig. 5

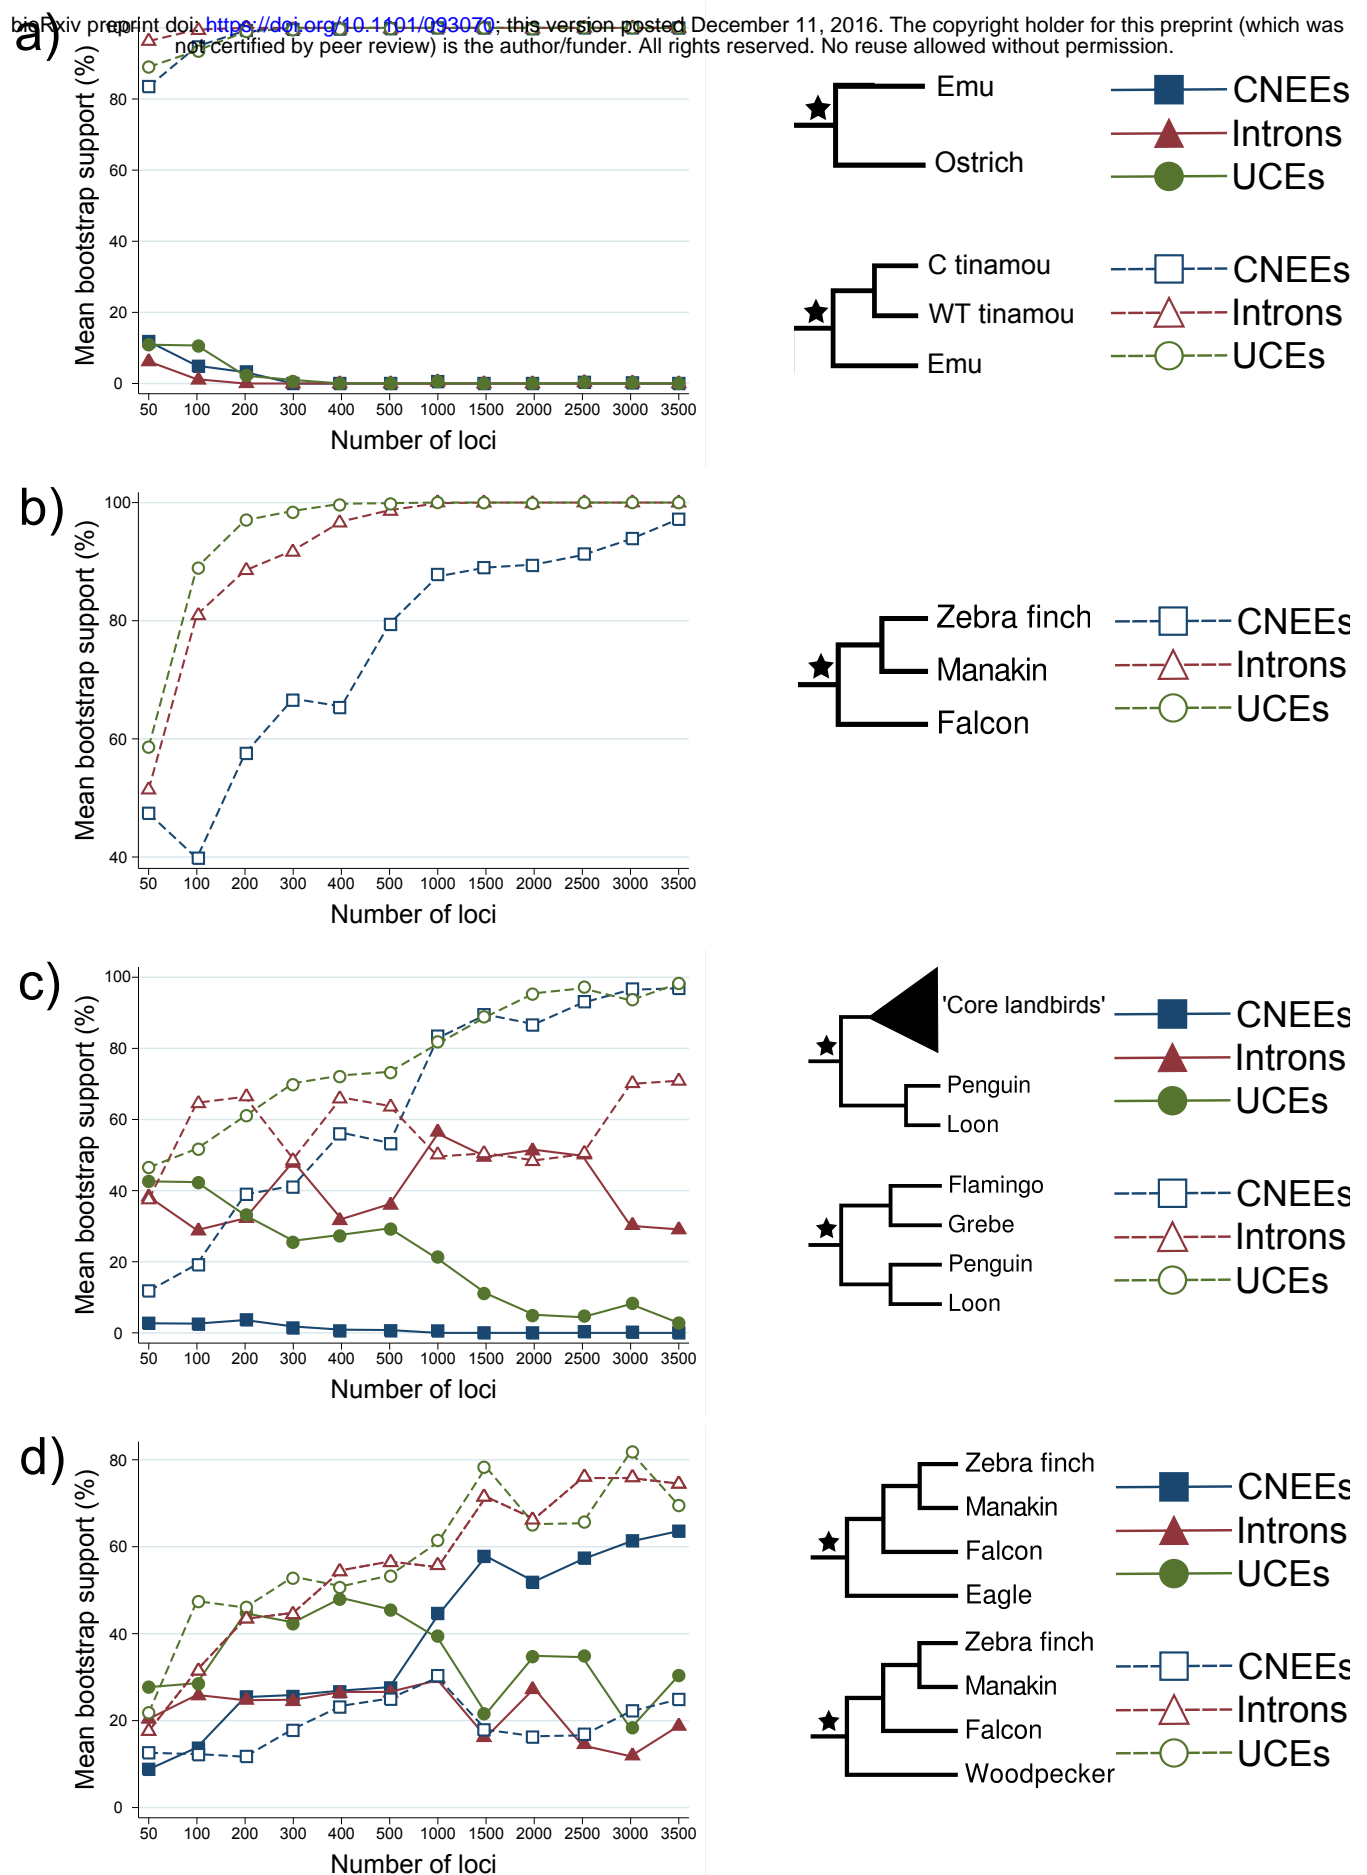

**Fig. 6**
